# Supplementary material for: Flow microreactor synthesis of disubstituted pyridines from dibromopyridines via Br/Li exchange without using cryogenic conditions
Source: Royal Society of Chemistry journal article supplement (doi:10.1039/c0gc00852d), 2011-01-01
Supplement: c0gc00852d.pdf [file c0gc00852d.pdf]

## Supporting Information

### Flow Microreactor Synthesis of Disubstituted Pyridines from Dibromopyridines via Br/Li Exchange without Using Cryogenic Conditions

Aiichiro Nagaki, Shigeyuki Yamada, Masatomo Doi, Yutaka Tomida, Naofumi Takabayashi, and Jun-ichi Yoshida

Department of Synthetic Chemistry and Biological Chemistry, Graduate School of Engineering, Kyoto University, Nishikyo-ku, Kyoto 615-8510, Japan

#### General

GC analysis was performed on a SHIMADZU GC-2014 gas chromatograph equipped with a flame ionization detector using a fused silica capillary column (column, CBPI; 0.25 mm x 25 m).  $^1\text{H}$  and  $^{13}\text{C}$  NMR spectra were recorded on Varian MERCURYplus-400 ( $^1\text{H}$  400 MHz,  $^{13}\text{C}$  100 MHz) spectrometer with  $\text{Me}_4\text{Si}$  or  $\text{CDCl}_3$  as a standard in  $\text{CDCl}_3$  unless otherwise noted. EI mass spectra were recorded on a JEOL JMS-SX102A spectrometer. ESI and APCI mass spectra were recorded on a JEOL JMS-T100CS spectrometer. THF was purchased from Kanto Chemical Co., Inc. as a dry solvent and were used without further purification. Hexane was purchased from Wako, was distilled before use, and was stored over molecular sieves 4A. 2,3-Dibromopyridine, 2-bromo-3-methylpyridine, 2,5-dibromopyridine, 2-bromo-5-methylpyridine, 2,6-dibromopyridine, 2-bromo-6-methylpyridine, 2-bromopyridine, iodomethane, chlorotrimethylsilane, benzaldehyde, cyanobenzene and acetophenone were commercially available. Stainless steel (SUS304) T-shaped micromixers with inner diameter of 250  $\mu\text{m}$  and 500  $\mu\text{m}$  were manufactured by Sanko Seiki Co., Inc. Stainless steel (SUS316) microtube reactors with inner diameter of 250, 500 and 1000  $\mu\text{m}$  were purchased from GL Sciences. The micromixers and the microtube reactors were connected with stainless steel fittings (GL Sciences, 1/16 OUN). The flow microreactor system was dipped in a cooling bath to control the temperature. Solutions were introduced to the flow microreactor system using syringe pumps, Harvard Model 11, equipped with gastight syringes purchased from SGE.

#### The Br/Li Exchange Reaction of 2,3-Dibromopyridine (1) Followed by Reaction with Iodomethane in a Macro Batch System

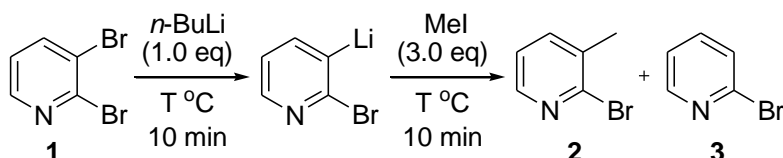

A solution of 2,3-dibromopyridine (**1**) (0.10 M, 3.0 mL) in THF was stirred at T °C. A solution of *n*-BuLi (0.40 M, 0.75 mL) in hexane was added dropwise to this solution at regular pace for 1.0 min. After stirring for 10 min, iodomethane (0.60 M, 1.5 mL) was added dropwise to this mixture at regular pace for 1.0 min. After stirring at T °C for 10 min, a cooling bath was removed. When the reaction mixture reached room temperature and was quenched with  $\text{H}_2\text{O}$ , the yields of 2-bromo-3-methylpyridine (**2**) and 2-bromopyridine (**3**), and the conversion of 2,3-dibromopyridine (**1**) was analyzed by GC. The results are summarized in Table S-1.

**Table S-1.** The Br/Li exchange reaction of 2,3-dibromopyridine (**1**) followed by reaction with iodomethane in a macro batch system.

| T<br>(°C) | <b>1</b><br>conversion (%) | <b>2</b><br>yield (%) | <b>3</b><br>yield (%) |
|-----------|----------------------------|-----------------------|-----------------------|
| -78       | 0                          | 48                    | 24                    |
| -48       | 0                          | 19                    | 26                    |
| -28       | 0                          | 0                     | 34                    |
| 0         | 0                          | 0                     | 21                    |

# The Br/Li Exchange Reaction of 2,3-Dibromopyridine (**1**) Followed by Reaction with Iodomethane in a Flow Microreactor System

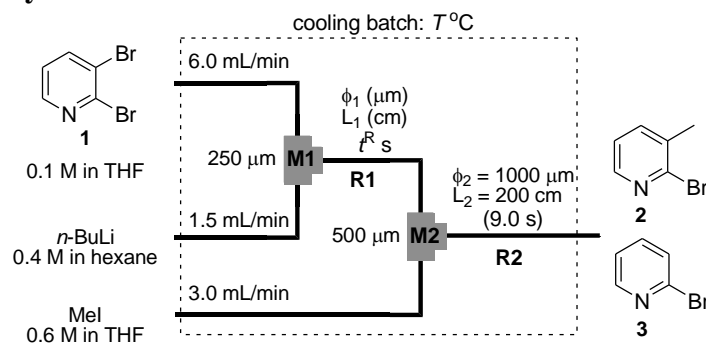

A flow microreactor system consisting of two T-shaped micromixers (**M1** ( $\phi = 250 \mu\text{m}$ ) and **M2** ( $\phi = 500 \mu\text{m}$ )), two microtube reactors (**R1** and **R2** ( $\phi_2 = 1000 \mu\text{m}$ ,  $L_2 = 200 \text{ cm}$ )), and three tube pre-cooling units (**P1** (inner diameter  $\phi = 1000 \mu\text{m}$ , length  $L = 100 \text{ cm}$ ), **P2** ( $\phi = 1000 \mu\text{m}$ ,  $L = 50 \text{ cm}$ ) and **P3** ( $\phi = 1000 \mu\text{m}$ ,  $L = 100 \text{ cm}$ )) was used. A solution of 2,3-dibromopyridine (**1**) (0.100 M in THF) (flow rate:  $6.00 \text{ mL min}^{-1}$ ) and a solution of *n*-BuLi (0.40 M in *n*-hexane) (flow rate:  $1.50 \text{ mL min}^{-1}$ ) were introduced to **M1** by syringe pumps. The resulting solution was passed through **R1** and was mixed with a solution of iodomethane (0.40 M in THF) (flow rate:  $3.00 \text{ mL min}^{-1}$ ) in **M2**. The resulting solution was passed through **R2**. After a steady state was reached, the product solution was collected for 30 s while being quenched with H<sub>2</sub>O. The reaction mixture was analyzed by gas chromatography. The results are summarized in Table S-2.

**Table S-2.** Deprotonation reaction of 2,3-dibromopyridine (**1**) with *n*-BuLi (1.0 eq) followed by reaction with iodomethane in flow microreactor systems.

| $L_1$<br>(cm) | $\phi_1$<br>( $\mu\text{m}$ ) | $t^R$<br>(s) | $T$<br>( $^{\circ}\text{C}$ ) | conversion (%) |          | yield (%) |  |
|---------------|-------------------------------|--------------|-------------------------------|----------------|----------|-----------|--|
|               |                               |              |                               | <b>1</b>       | <b>2</b> | <b>3</b>  |  |
| 3.50          | 250                           | 0.014        | 25                            | 94             | 64       | 3         |  |
| 3.50          | 500                           | 0.055        |                               | 100            | 60       | 1         |  |
| 3.50          | 1000                          | 0.22         |                               | 100            | 57       | 4         |  |
| 12.5          |                               | 0.79         |                               | 100            | 31       | 7         |  |
| 50.0          |                               | 3.1          |                               | 100            | 10       | 6         |  |
| 200           |                               | 13           |                               | 100            | 0        | 6         |  |
| 3.50          | 250                           | 0.014        | 0                             | 100            | 84       | 1         |  |
| 3.50          | 500                           | 0.055        |                               | 100            | 87       | 1         |  |
| 3.50          | 1000                          | 0.22         |                               | 100            | 83       | 4         |  |
| 12.5          |                               | 0.79         |                               | 100            | 74       | 5         |  |
| 50.0          |                               | 3.1          |                               | 100            | 70       | 5         |  |
| 200           |                               | 13           |                               | 100            | 49       | 7         |  |
| 3.50          | 250                           | 0.014        | -28                           | 100            | 92       | 5         |  |
| 3.50          | 500                           | 0.055        |                               | 100            | 88       | 5         |  |
| 3.50          | 1000                          | 0.22         |                               | 100            | 86       | 4         |  |
| 12.5          |                               | 0.79         |                               | 100            | 86       | 5         |  |
| 50.0          |                               | 3.1          |                               | 100            | 84       | 4         |  |
| 200           |                               | 13           |                               | 100            | 69       | 3         |  |
| 3.50          | 250                           | 0.014        | -48                           | 100            | 88       | 5         |  |
| 3.50          | 500                           | 0.055        |                               | 100            | 88       | 4         |  |
| 3.50          | 1000                          | 0.22         |                               | 100            | 90       | 4         |  |
| 12.5          |                               | 0.79         |                               | 100            | 85       | 4         |  |
| 50.0          |                               | 3.1          |                               | 100            | 91       | 3         |  |
| 200           |                               | 13           |                               | 100            | 80       | 4         |  |
| 3.50          | 250                           | 0.014        | -78                           | 100            | 91       | 5         |  |
| 3.50          | 500                           | 0.055        |                               | 100            | 93       | 4         |  |
| 3.50          | 1000                          | 0.22         |                               | 100            | 93       | 4         |  |
| 12.5          |                               | 0.79         |                               | 100            | 93       | 5         |  |

|      |     |     |    |   |
|------|-----|-----|----|---|
| 50.0 | 3.1 | 97  | 86 | 5 |
| 200  | 13  | 100 | 89 | 3 |

### Typical Procedure for The Br/Li Exchange Reaction of Dibromopyridines Followed by Reaction with Iodomethane in a Flow Microreactor System

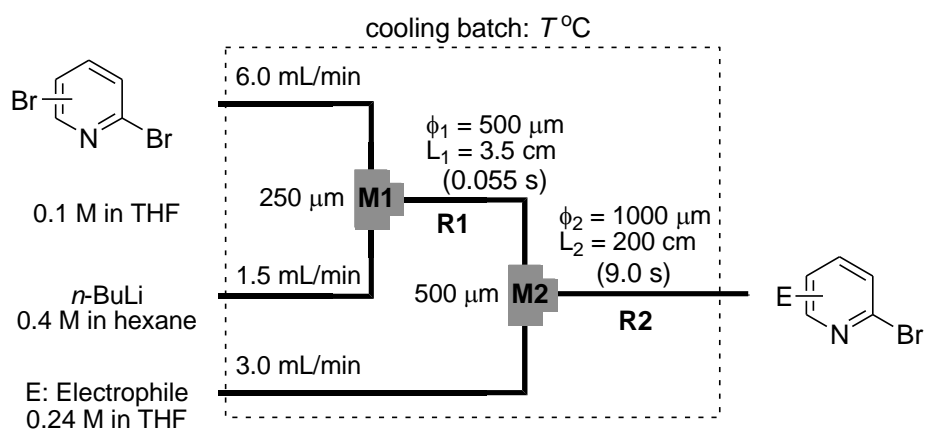

A flow microreactor system consisting of two T-shaped micromixers (**M1** ( $\phi = 250\ \mu\text{m}$ ) and **M2** ( $\phi = 500\ \mu\text{m}$ )), two microtube reactors (**R1** ( $\phi_1 = 500\ \mu\text{m}$ ,  $L_1 = 3.5\ \text{cm}$ ) and **R2** ( $\phi = 1000\ \mu\text{m}$ ,  $L = 200\ \text{cm}$ )), and three tube pre-cooling units (**P1** (inner diameter  $\phi = 1000\ \mu\text{m}$ , length  $L = 100\ \text{cm}$ ), **P2** ( $\phi = 1000\ \mu\text{m}$ ,  $L = 50\ \text{cm}$ ) and **P3** ( $\phi = 1000\ \mu\text{m}$ ,  $L = 100\ \text{cm}$ )) was used. A solution of bromopyridine (0.100 M in THF) (flow rate:  $6.00\ \text{mL min}^{-1}$ ) and a solution of *n*-BuLi (0.40 M in *n*-hexane) (flow rate:  $1.50\ \text{mL min}^{-1}$ ) were introduced to **M1** by syringe pumps. The resulting solution was passed through **R1** and was mixed with a solution of iodomethane (0.24 M in THF) (flow rate:  $3.00\ \text{mL min}^{-1}$ ) in **M2**. The resulting solution was passed through **R2**. After a steady state was reached, the product solution was collected for 30 s while being quenched with  $\text{H}_2\text{O}$ . Yields were determined by gas chromatography or isolation. In all cases of 2,3-dibromopyridine (**1**), 2,5-dibromopyridine, and 2,6-dibromopyridine,  $T = 0\ ^\circ\text{C}$  was selected as a bath temperature.

2-Bromo-3-methylpyridine, 2-bromo-5-methylpyridine, and 2-bromo-6-methylpyridine were in accordance with the spectral data of the commercially available compounds.

The spectral data of 2-bromo-3-trimethylsilylpyridine, 2-bromo-3-( $\alpha$ -hydroxybenzyl)pyridine, 2-bromo-5-( $\alpha$ -hydroxybenzyl)pyridine, 2-bromo-6-trimethylsilylpyridine, 2-bromo-6-( $\alpha$ -hydroxybenzyl)pyridine were identical to those reported in the literature.<sup>1</sup>

The analytical data for 2-bromo-5-trimethylsilylpyridine were identical to those reported in the literature.<sup>2</sup>

## Typical Procedure for Sequential Introduction of Two Electrophiles into Dibromopyridines

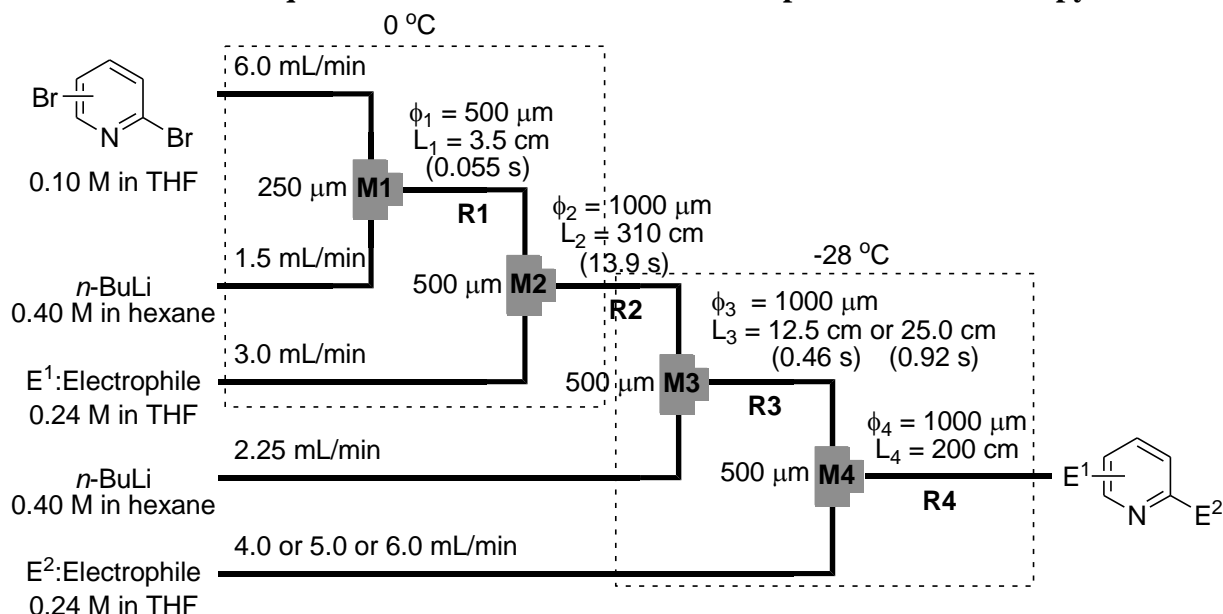

A flow microreactor system consisting of four T-shaped micromixers (**M1**, **M2**, **M3** and **M4**), four microtube reactors (**R1**, **R2**, **R3** and **R4**) and six tube pre-cooling units (**P1** (inner diameter  $\phi$  = 1000  $\mu$ m, length  $L$  = 100 cm), **P2** ( $\phi$  = 1000  $\mu$ m,  $L$  = 50 cm) and **P3** ( $\phi$  = 1000  $\mu$ m,  $L$  = 100 cm), **P4** ( $\phi$  = 1000  $\mu$ m,  $L$  = 50 cm), **P5** ( $\phi$  = 1000  $\mu$ m,  $L$  = 100 cm)) was used. The flow microreactor system consisting of **M1**, **M2**, **R1**, **R2**, **P1**, **P2** and **P3** was dipped in a cooling bath at 0 °C. The flow microreactor system consisting of **M3**, **M4**, **R2**, **R3**, **R4**, **P4** and **P5** was dipped in a bath cooled at -28 °C. A solution of dibromopyridines (0.10 M in THF) (flow rate: 6.00 mL min<sup>-1</sup>) and a solution of *n*-BuLi (0.40 M in *n*-hexane) (flow rate: 1.5 mL min<sup>-1</sup>) were introduced to **M1** ( $\phi$  = 250  $\mu$ m). The resulting solution was passed through **R1** ( $\phi_1$  = 500  $\mu$ m,  $L_1$  = 3.5 cm) and was mixed with a solution of a first electrophile (E<sup>1</sup>: Electrophile-1) (0.24 M in THF) (flow rate: 3.0 mL min<sup>-1</sup>) in **M2** ( $\phi$  = 500  $\mu$ m). The resulting solution was passed through **R2** ( $\phi_2$  = 1000  $\mu$ m,  $L_2$  = 310 cm (200 cm at 0 °C, 10 cm at ambient temperature, and 100 cm at -28 °C)), and was introduced to **M3** ( $\phi$  = 500  $\mu$ m) where the solution was mixed with a solution of *n*-BuLi (0.40 M in *n*-hexane) (flow rate: 2.25 mL min<sup>-1</sup>). The resulting solution was passed through **R3** ( $\phi_3$  = 1000  $\mu$ m,  $L_3$  = 12.5 or 25 cm) and was introduced to **M4** ( $\phi$  = 500  $\mu$ m) where the solution was mixed with a solution of a second electrophile (E<sup>2</sup>: Electrophile-2) (0.24 M in THF) (flow rate: 4.0 or 5.0 or 6.0 mL min<sup>-1</sup>). The resulting solution was passed through **R4** ( $\phi_4$  = 1000  $\mu$ m,  $L_4$  = 200 cm). After a steady state was reached, the product solution was collected for 30 s while being quenched with H<sub>2</sub>O. The organic phase was separated and the aqueous phase was extracted with diethyl ether. The combined organic phase was concentrated, and the resulting crude product was purified by flash chromatography on silica gel.

**2-( $\alpha$ -Hydroxybenzyl)-3-methylpyridine.** The reaction was performed under the following condition; flow rate of a solution of benzaldehyde (Electrophile-2): 4.0 mL min<sup>-1</sup>, **R3**:  $\phi$  = 1000  $\mu$ m,  $L$  = 12.5 cm. After extraction with Et<sub>2</sub>O, the crude product was purified by silica gel chromatography (hexane/AcOEt = 2/1) to afford 2-( $\alpha$ -hydroxybenzyl)-3-methylpyridine (40.4 mg, 68% yield, 88% purity (determined by GC)). 3-( $\alpha$ -Hydroxybenzyl)-2-methylpyridine was observed by GCMS as a major byproduct (9%, GC). <sup>1</sup>H NMR for title compound (400 MHz, CDCl<sub>3</sub>)  $\delta$  2.07 (s, 3H), 5.73 (s, 1H), 5.92-6.12 (s, 1H), 7.14-7.46 (m, 8H) ppm; <sup>13</sup>C NMR (100 MHz, CDCl<sub>3</sub>)  $\delta$  17.8, 72.5, 122.6, 127.7, 127.8, 128.4, 130.4, 138.5, 142.3, 144.9, 157.9 ppm; HRMS (CI)  $m/z$  calcd for (MH<sup>+</sup>) C<sub>13</sub>H<sub>14</sub>NO: 200.1076, found: 200.1073. When the reactions in **R3** and **R4** were carried out at 0 °C, the yield was lower (23.0 mg, 38%).

**2-Benzoyl-3-methylpyridine.** The reaction was performed under the following condition; flow rate of a solution of benzonitrile (Electrophile-2): 5.0 mL min<sup>-1</sup>, **R3**:  $\phi_3$  = 1000  $\mu$ m,  $L_3$  = 25 cm. After extraction with Et<sub>2</sub>O, the crude product was purified by silica gel chromatography (hexane/AcOEt = 2/1) to afford 27.9 mg of 2-benzoyl-3-methylpyridine (47% yield, 97% purity (GC)). <sup>1</sup>H NMR (400 MHz, CDCl<sub>3</sub>)  $\delta$  2.42 (s, 3H), 7.33 (dd,  $J$  = 8.0, 4.8 Hz, 1H), 7.42-7.50 (m, 2H), 7.54-7.62 (m, 1H), 7.66 (dd,  $J$  = 6.8, 0.8 Hz, 1H), 7.84-7.90 (m, 2H), 8.51 (dd,  $J$  = 4.8, 1.2 Hz, 1H) ppm; <sup>13</sup>C NMR (100 MHz, CDCl<sub>3</sub>)  $\delta$  18.4, 124.6, 128.4, 130.5, 132.8, 133.4, 136.4, 139.0, 146.0, 155.0, 195.3 ppm; HRMS (EI)  $m/z$  calcd for (M<sup>+</sup>) C<sub>13</sub>H<sub>11</sub>NO: 197.0841, found: 197.0840.

**2-( $\alpha$ -Hydroxybenzyl)-5-methylpyridine.** The reaction was performed under the following condition; flow rate of a solution of benzaldehyde (Electrophile-2): 4.0 mL min<sup>-1</sup>, **R3**:  $\phi$  = 1000  $\mu$ m, L = 25 cm. After extraction with Et<sub>2</sub>O, the crude product was purified by silica gel chromatography (hexane/AcOEt = 1/2) to afford 2-( $\alpha$ -hydroxybenzyl)-5-methylpyridine (44.9 mg, 75% yield, 81% purity (GC)). 5-( $\alpha$ -Hydroxybenzyl)-2-methylpyridine was observed by GCMS as a major byproduct (9%, GC). 2- and 3-Hydroxybenzylpyridines as unpurified byproducts were also observed by GCMS (total 10%, GC). <sup>1</sup>H NMR for title compound (400 MHz, CDCl<sub>3</sub>)  $\delta$  2.31 (s, 3H), 4.65-5.50 (m, 1H), 5.72 (s, 1H), 7.03 (d, *J* = 7.6 Hz, 1H), 7.21-7.45 (m, 6H), 8.35-8.40 (m, 1H) ppm; <sup>13</sup>C NMR (100 MHz, CDCl<sub>3</sub>)  $\delta$  18.0, 74.7, 120.74, 126.9, 127.7, 128.5, 131.9, 137.5, 143.4, 148.0, 158.1 ppm; HRMS (ESI) *m/z* calcd for (MH<sup>+</sup>) C<sub>13</sub>H<sub>14</sub>NO: 200.1076, found: 200.1073.

**2-( $\alpha$ -Hydroxybenzyl)-5-trimethylsilylpyridine.** The reaction was performed under the following condition; flow rate of a solution of benzaldehyde (Electrophile-2): 4.0 mL min<sup>-1</sup>, **R3**:  $\phi_3$  = 1000  $\mu$ m, L<sub>3</sub> = 12.5 cm. After extraction with Et<sub>2</sub>O, the crude product was purified by silica gel chromatography (hexane/AcOEt = 2/1) to afford 39.6 mg of 2-( $\alpha$ -hydroxybenzyl)-5-trimethylsilylpyridine (51% yield, 93% purity (GC)). 5-( $\alpha$ -Hydroxybenzyl)-2-trimethylsilylpyridine was observed by GCMS as a major byproduct (7%, GC). <sup>1</sup>H NMR (400 MHz, CDCl<sub>3</sub>)  $\delta$  0.29 (s, 9H), 5.74 (s, 1H), 7.12 (d, *J* = 7.6 Hz, 1H), 7.22-7.42 (m, 5H), 7.72 (dd, *J* = 7.6, 7.6 Hz, 1H), 8.60-8.64 (m, 1H) ppm; <sup>13</sup>C NMR (100 MHz, CDCl<sub>3</sub>)  $\delta$  1.3, 74.8, 120.8, 127.0, 127.8, 128.5, 133.8, 124.0, 143.2, 151.8, 160.9 ppm; HRMS (APCI) *m/z* calcd for (MH<sup>+</sup>) C<sub>15</sub>H<sub>20</sub>NOSi: 258.1315, found: 258.1238.

**2-( $\alpha$ -Hydroxybenzyl)-6-methylpyridine.** The reaction was performed under the following condition; flow rate of a solution of benzaldehyde (Electrophile-2): 4.0 mL min<sup>-1</sup>, **R3**:  $\phi_3$  = 1000  $\mu$ m, L<sub>3</sub> = 25 cm. After extraction with Et<sub>2</sub>O, the crude product was purified by silica gel chromatography (hexane/AcOEt = 2/1) to afford 40.0 mg of 2-( $\alpha$ -hydroxybenzyl)-6-methylpyridine (67% yield, >99% purity (GC)). <sup>1</sup>H NMR (400 MHz, CDCl<sub>3</sub>)  $\delta$  2.57 (s, 3H), 5.69 (s, 1H), 6.88 (d, *J* = 7.6 Hz, 1H), 7.02 (d, *J* = 7.6 Hz, 1H), 7.22-7.42 (m, 5H), 7.47 (dd, *J* = 7.6, 7.6 Hz, 1H) ppm; <sup>13</sup>C NMR (100 MHz, CDCl<sub>3</sub>)  $\delta$  24.2, 74.5, 118.3, 121.8, 127.1, 127.6, 128.4, 137.0, 143.4, 156.6, 159.8 ppm; HRMS (APCI) *m/z* calcd for (MH<sup>+</sup>) C<sub>13</sub>H<sub>14</sub>NO: 200.1076, found: 200.1074.

**2-Benzoyl-6-methylpyridine.** The reaction was performed under the following condition; flow rate of a solution of benzonitrile (Electrophile-2): 6.0 mL min<sup>-1</sup>, **R3**:  $\phi_3$  = 1000  $\mu$ m, L<sub>3</sub> = 25 cm. After extraction with Et<sub>2</sub>O, the crude product was purified by silica gel chromatography (hexane/AcOEt = 2/1) to afford 32.9 mg of 2-benzoyl-6-methylpyridine (56% yield, >99% purity (GC)). <sup>1</sup>H NMR (400 MHz, CDCl<sub>3</sub>)  $\delta$  2.63 (s, 3H), 7.31-7.36 (m, 1H), 7.44-7.52 (m, 2H), 7.54-7.62 (m, 1H), 7.72-7.80 (m, 2H), 8.06-8.12 (m, 2H) ppm; <sup>13</sup>C NMR (100 MHz, CDCl<sub>3</sub>)  $\delta$  24.5, 121.6, 125.7, 128.0, 131.2, 132.8, 136.2, 137.0, 154.7, 157.7, 193.9 ppm; HRMS (APCI) *m/z* calcd for (MH<sup>+</sup>) C<sub>13</sub>H<sub>12</sub>NO: 198.0920, found: 198.0913.

**2-(1-Hydroxy-1-phenylethyl)-6-trimethylsilylpyridine.** The reaction was performed under the following condition; flow rate of a solution of acetophenone (Electrophile-2): 4.0 mL min<sup>-1</sup>, **R3**:  $\phi_3$  = 1000  $\mu$ m, L<sub>3</sub> = 25 cm. After extraction with Et<sub>2</sub>O, the crude product was purified by silica gel chromatography (hexane/AcOEt = 2/1) to afford 45.7 mg of 2-(1-hydroxy-1-phenylethyl)-6-trimethylsilylpyridine (56% yield, >99% purity (GC)). <sup>1</sup>H NMR (400 MHz, CDCl<sub>3</sub>)  $\delta$  0.33 (s, 9H), 1.92 (s, 3H), 6.82 (s, 1H), 7.13 (d, *J* = 8.4 Hz, 1H), 7.17-7.24 (m, 1H), 7.28-7.34 (m, 2H), 7.39 (d, *J* = 7.2 Hz, 1H), 7.46-7.56 (m, 3H) ppm; <sup>13</sup>C NMR (100 MHz, CDCl<sub>3</sub>)  $\delta$  -1.9, 29.1, 74.6, 119.5, 126.0, 126.8, 127.1, 128.1, 135.1, 147.3, 163.7, 165.3 ppm; HRMS (ESI) *m/z* calcd for (MH<sup>+</sup>) C<sub>16</sub>H<sub>21</sub>NOSi: 272.1471, found: 272.1465.

## References

- <sup>1</sup> Trécourt, F.; Breton, G.; Bonnet, V.; Mongin, F.; Marsais, F.; Quéguiner, G. *Tetrahedron*, **2000**, *56*, 1349-1360.
- <sup>2</sup> For the spectral data of 2-bromo-5-trimethylsilylpyridine; Stange, A. F.; Tokura, S.; Kira, M. *J. Organomet. Chem.* **2000**, *612*, 117-124.

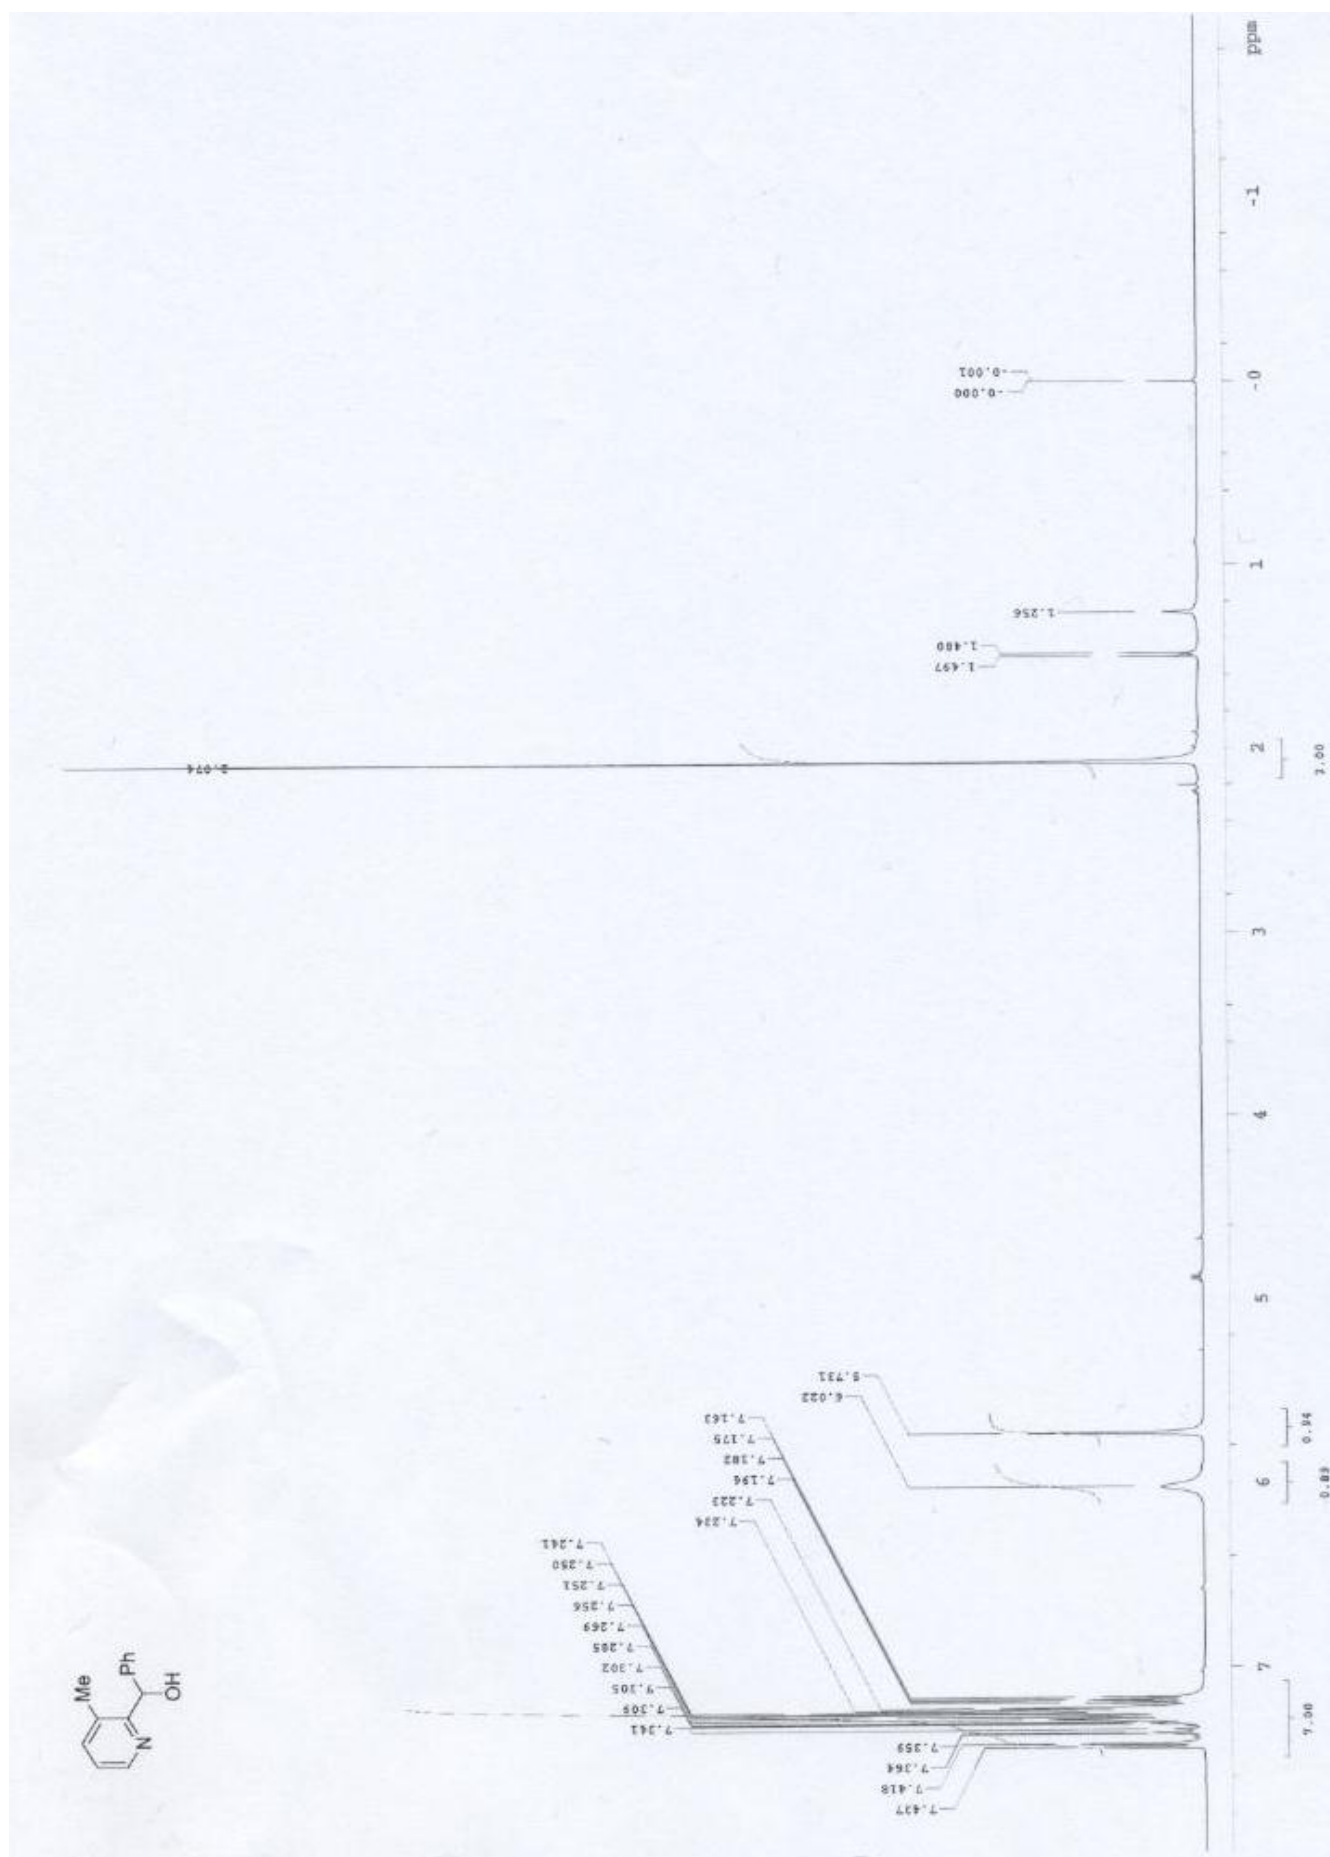

<sup>1</sup>H NMR spectrum of 2-( $\alpha$ -hydroxybenzyl)-3-methylpyridine

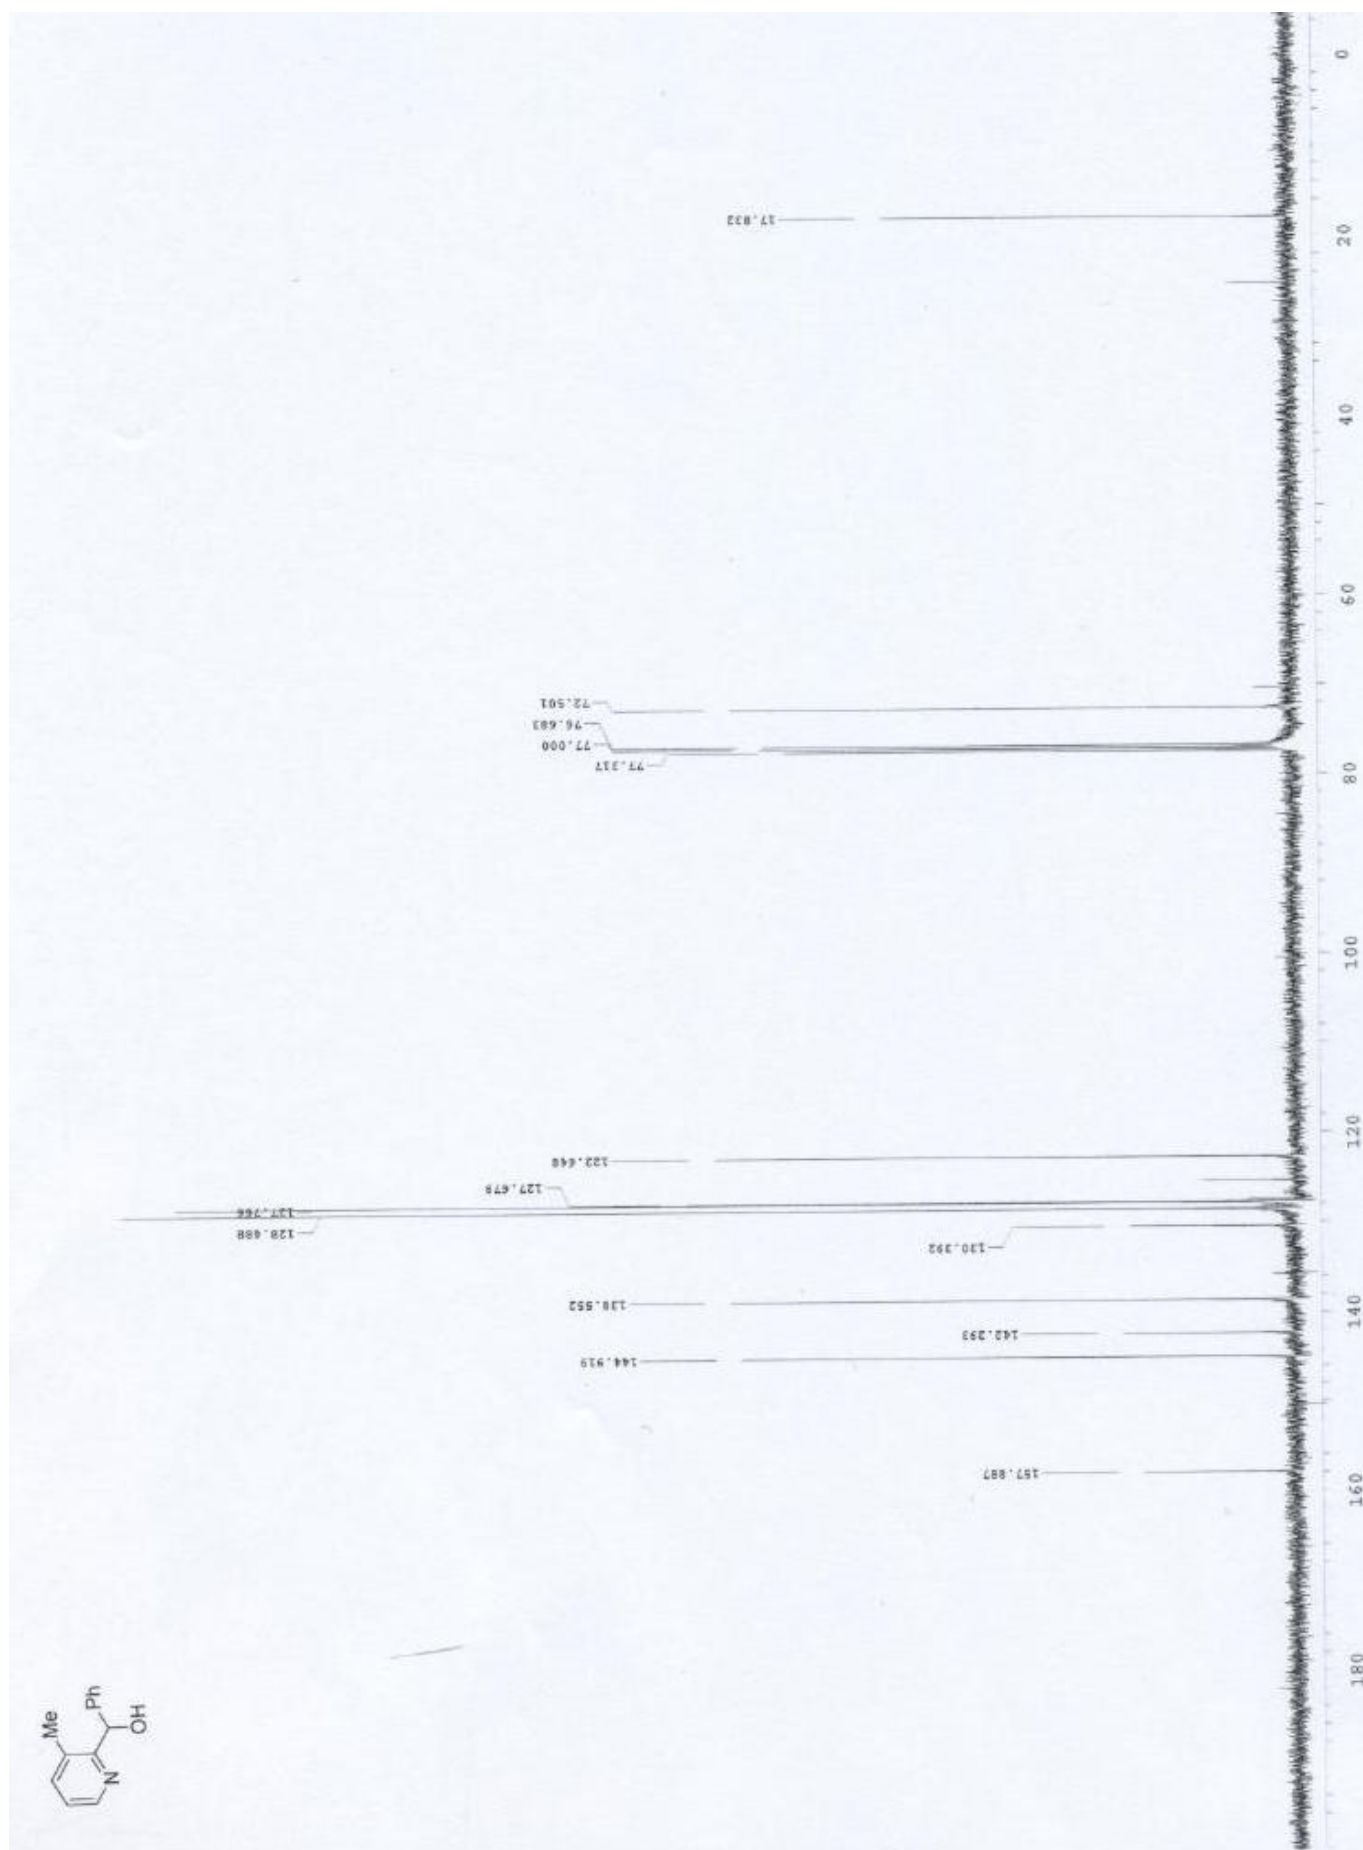

$^{13}\text{C}$  NMR spectrum of 2-( $\alpha$ -hydroxybenzyl)-3-methylpyridine

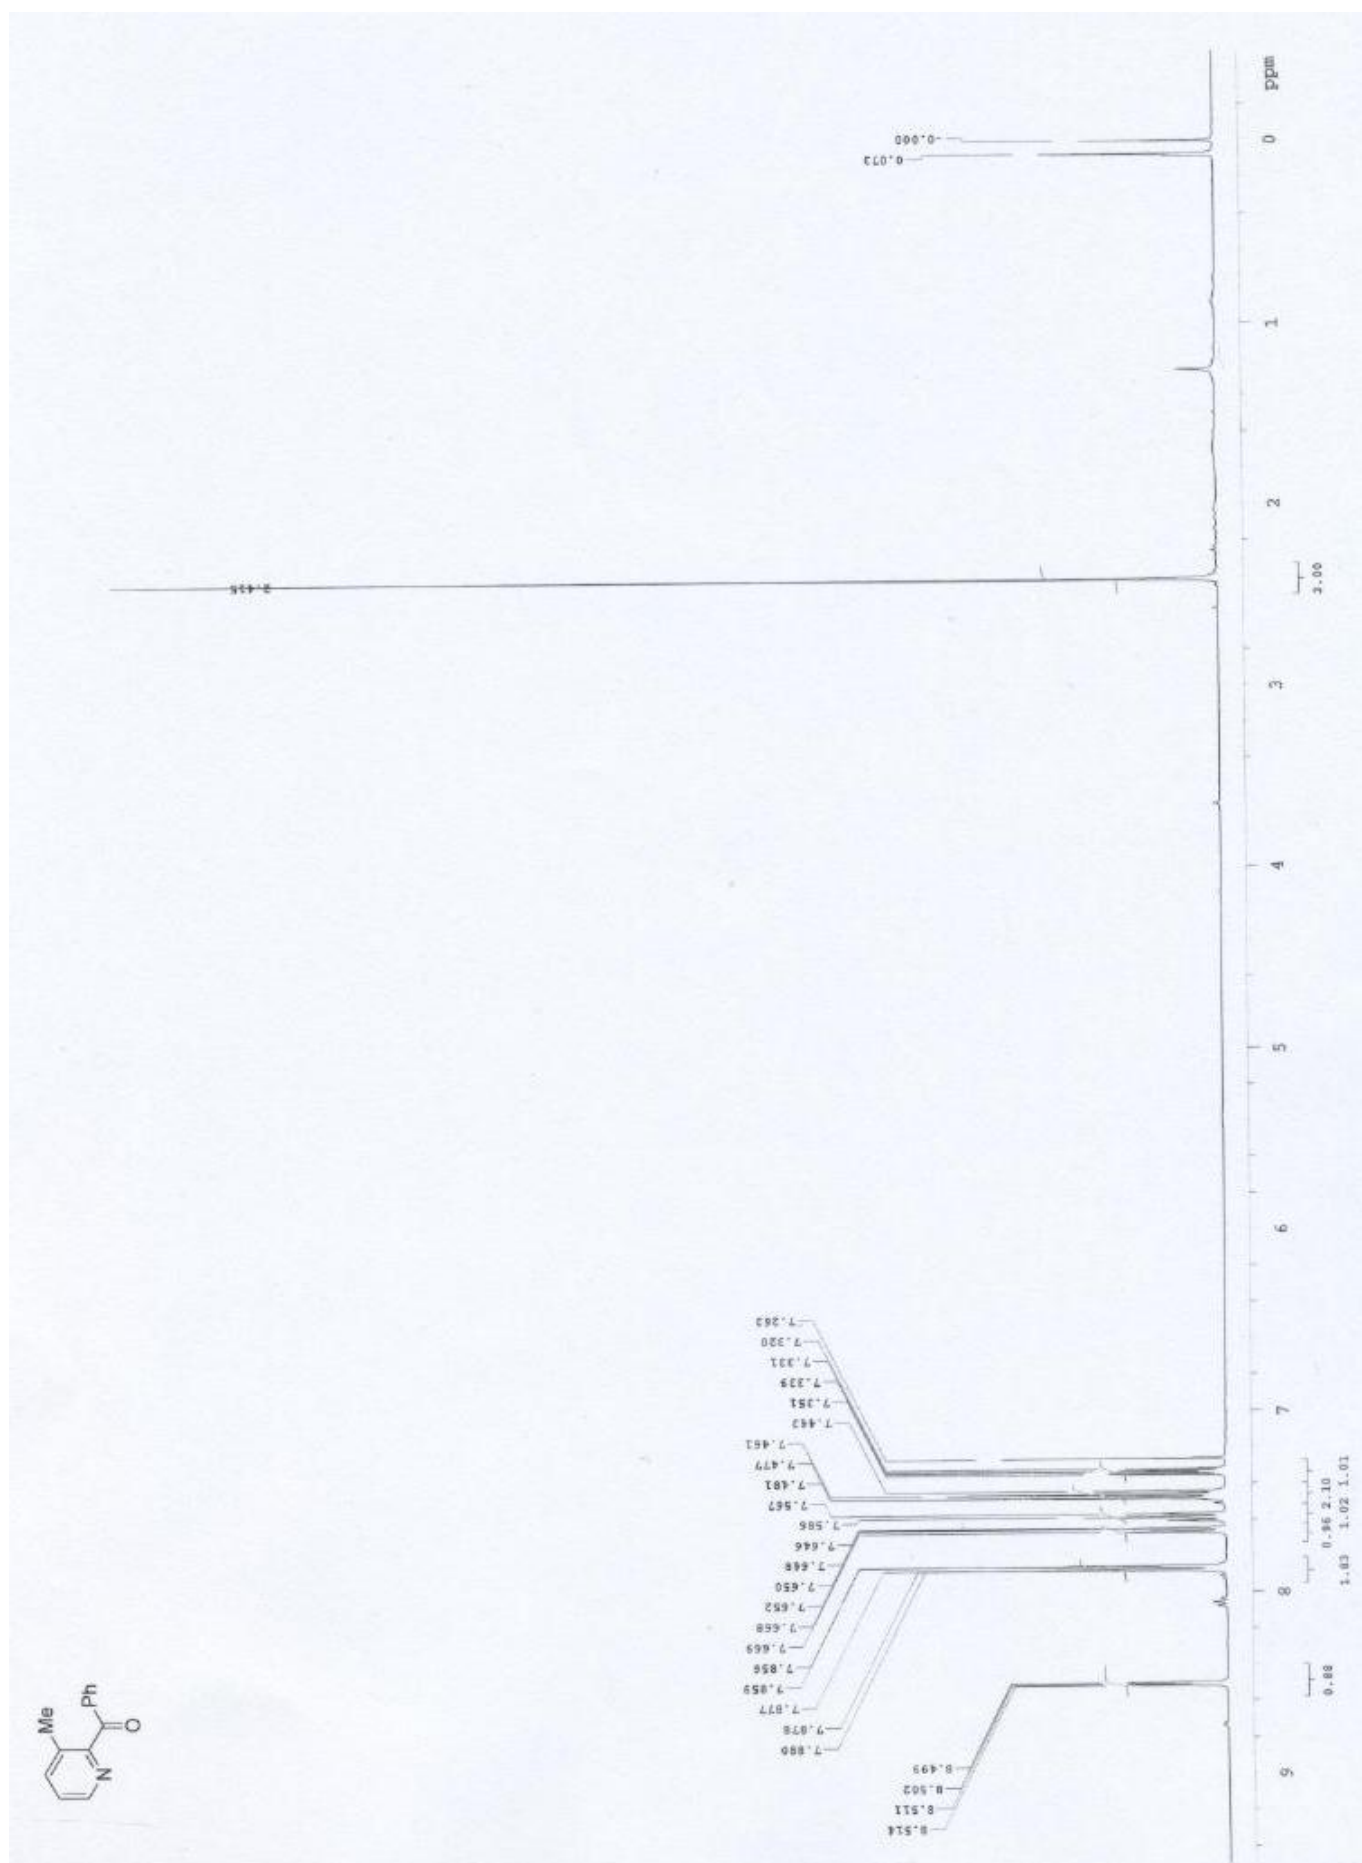

<sup>1</sup>H NMR spectrum of 2-benzoyl-3-methylpyridine



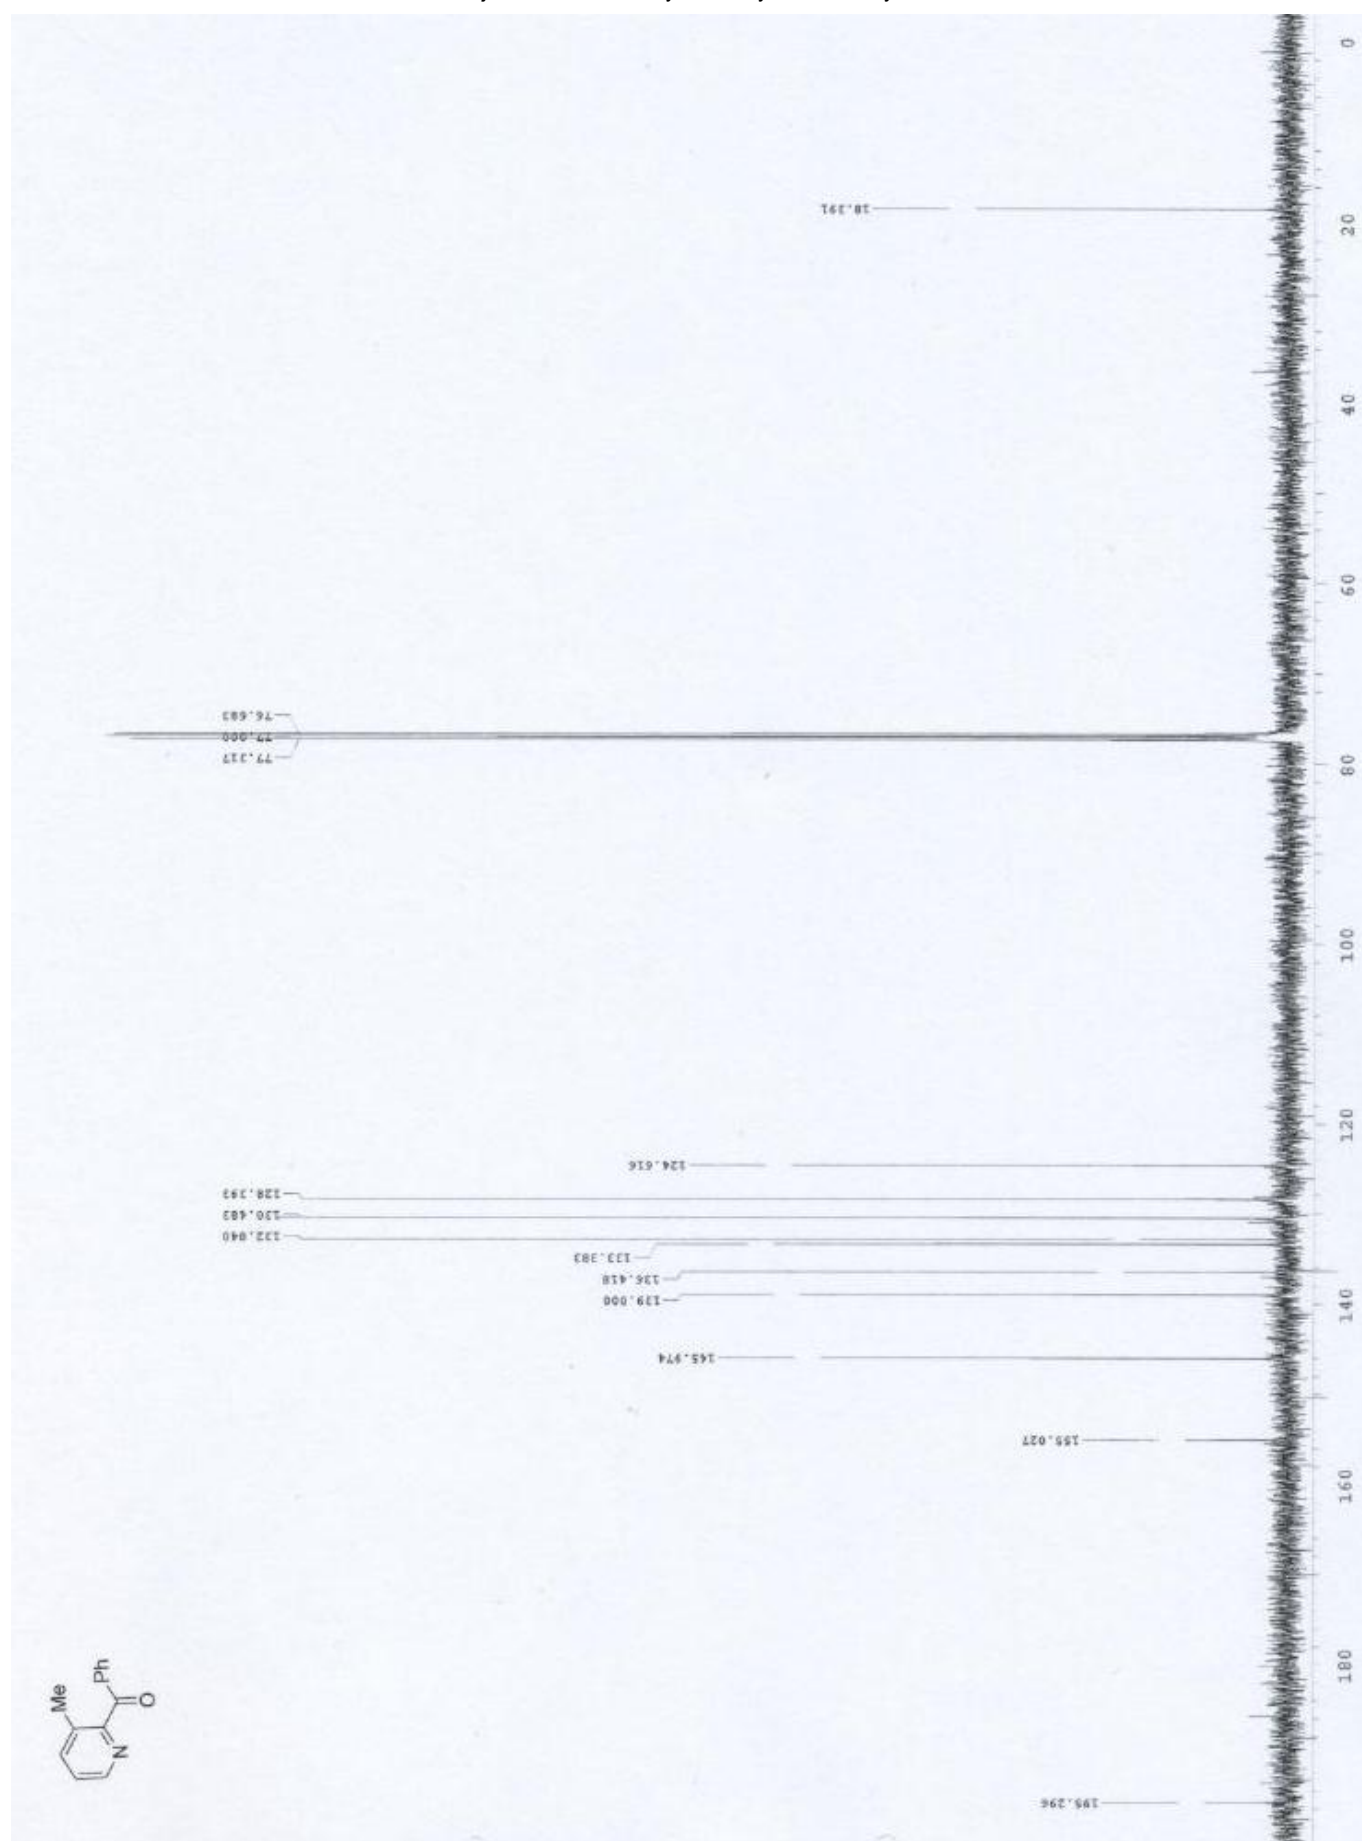

$^{13}\text{C}$  NMR spectrum of 2-benzoyl-3-methylpyridine

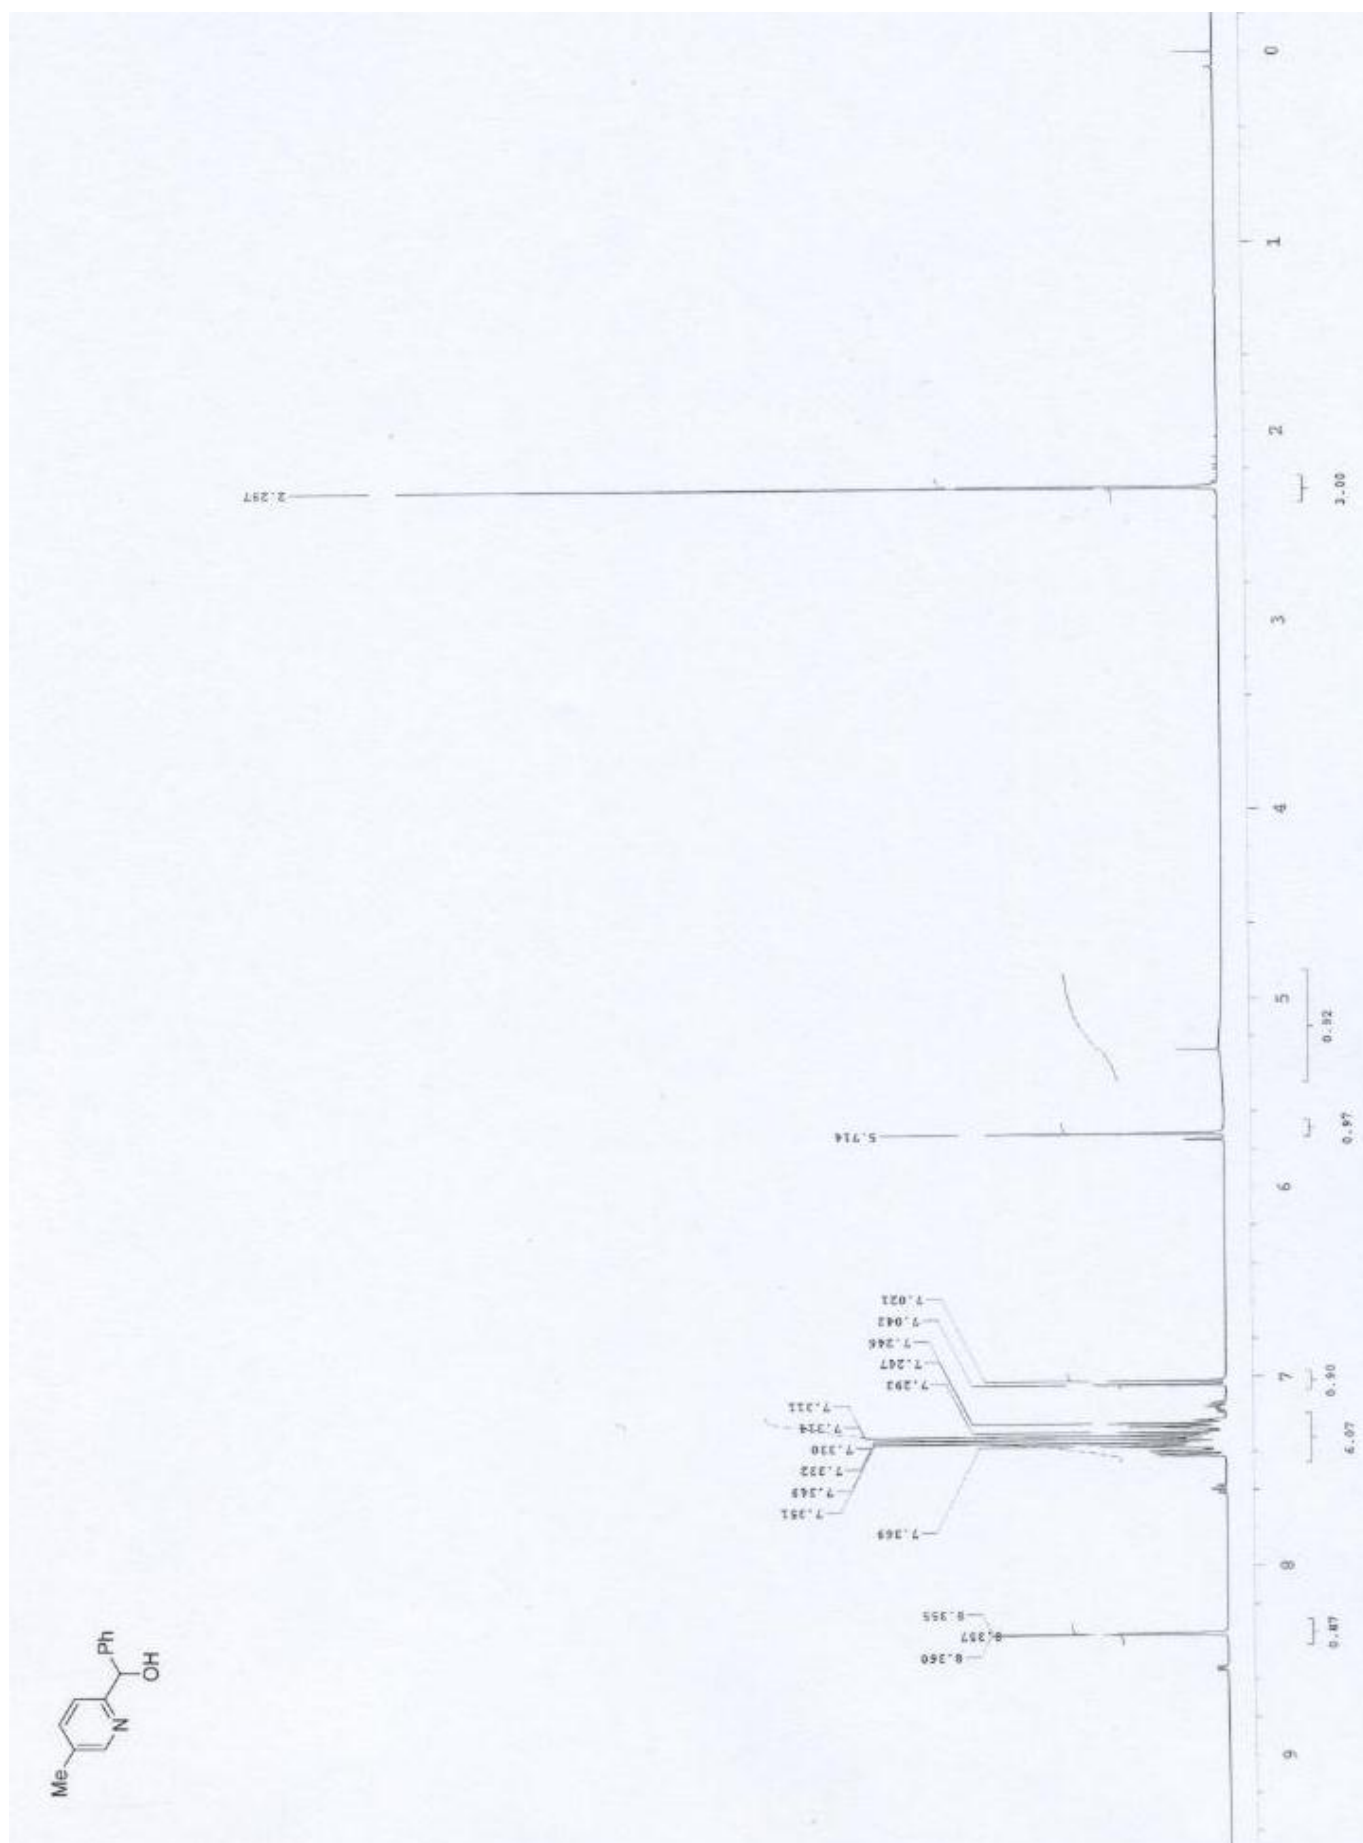

<sup>1</sup>H NMR spectrum of 2-(α-hydroxybenzyl)-5-methylpyridine

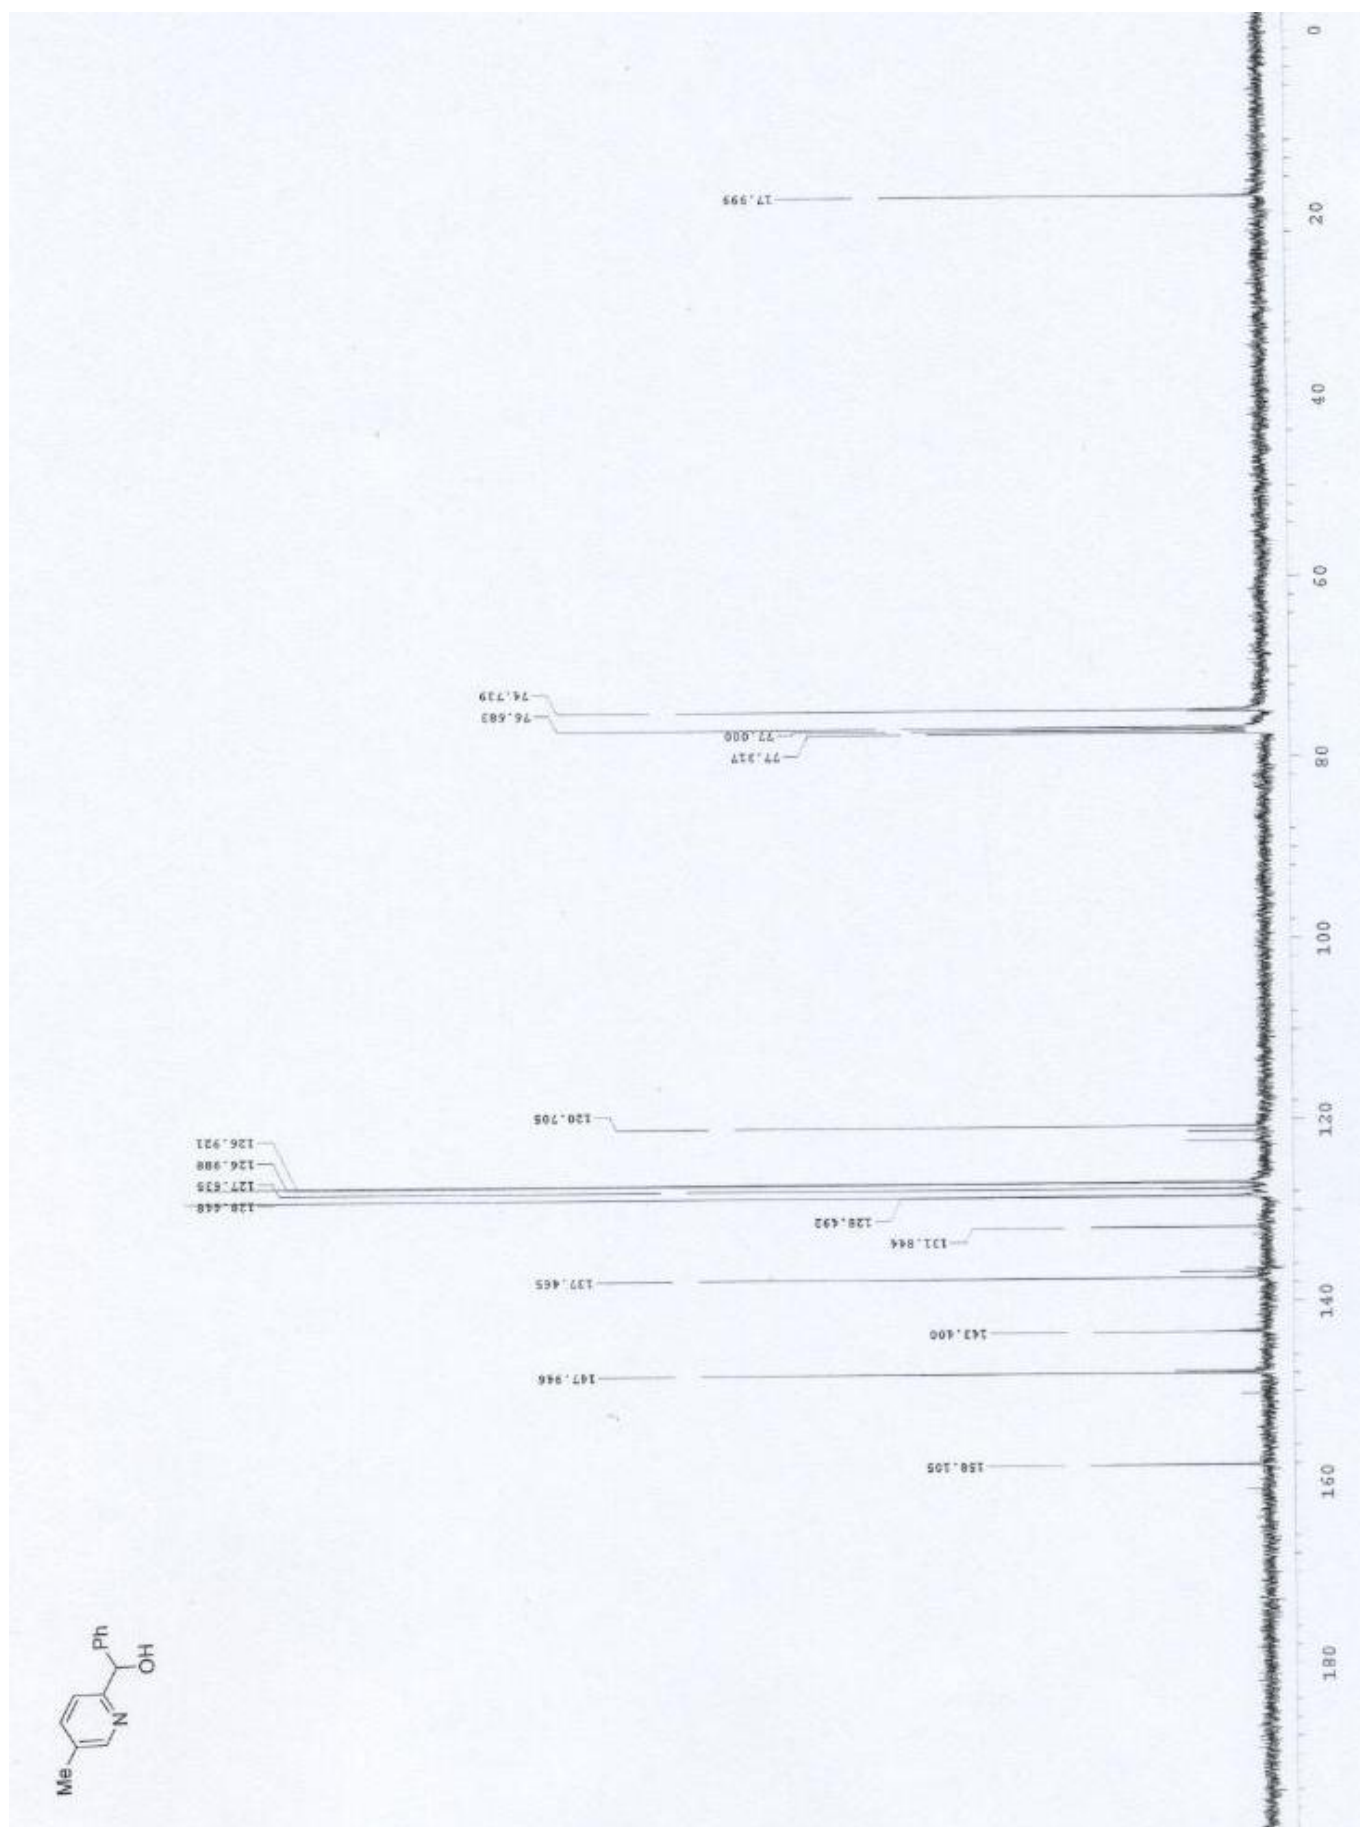

$^{13}\text{C}$  NMR spectrum of 2-( $\alpha$ -hydroxybenzyl)-5-methylpyridine

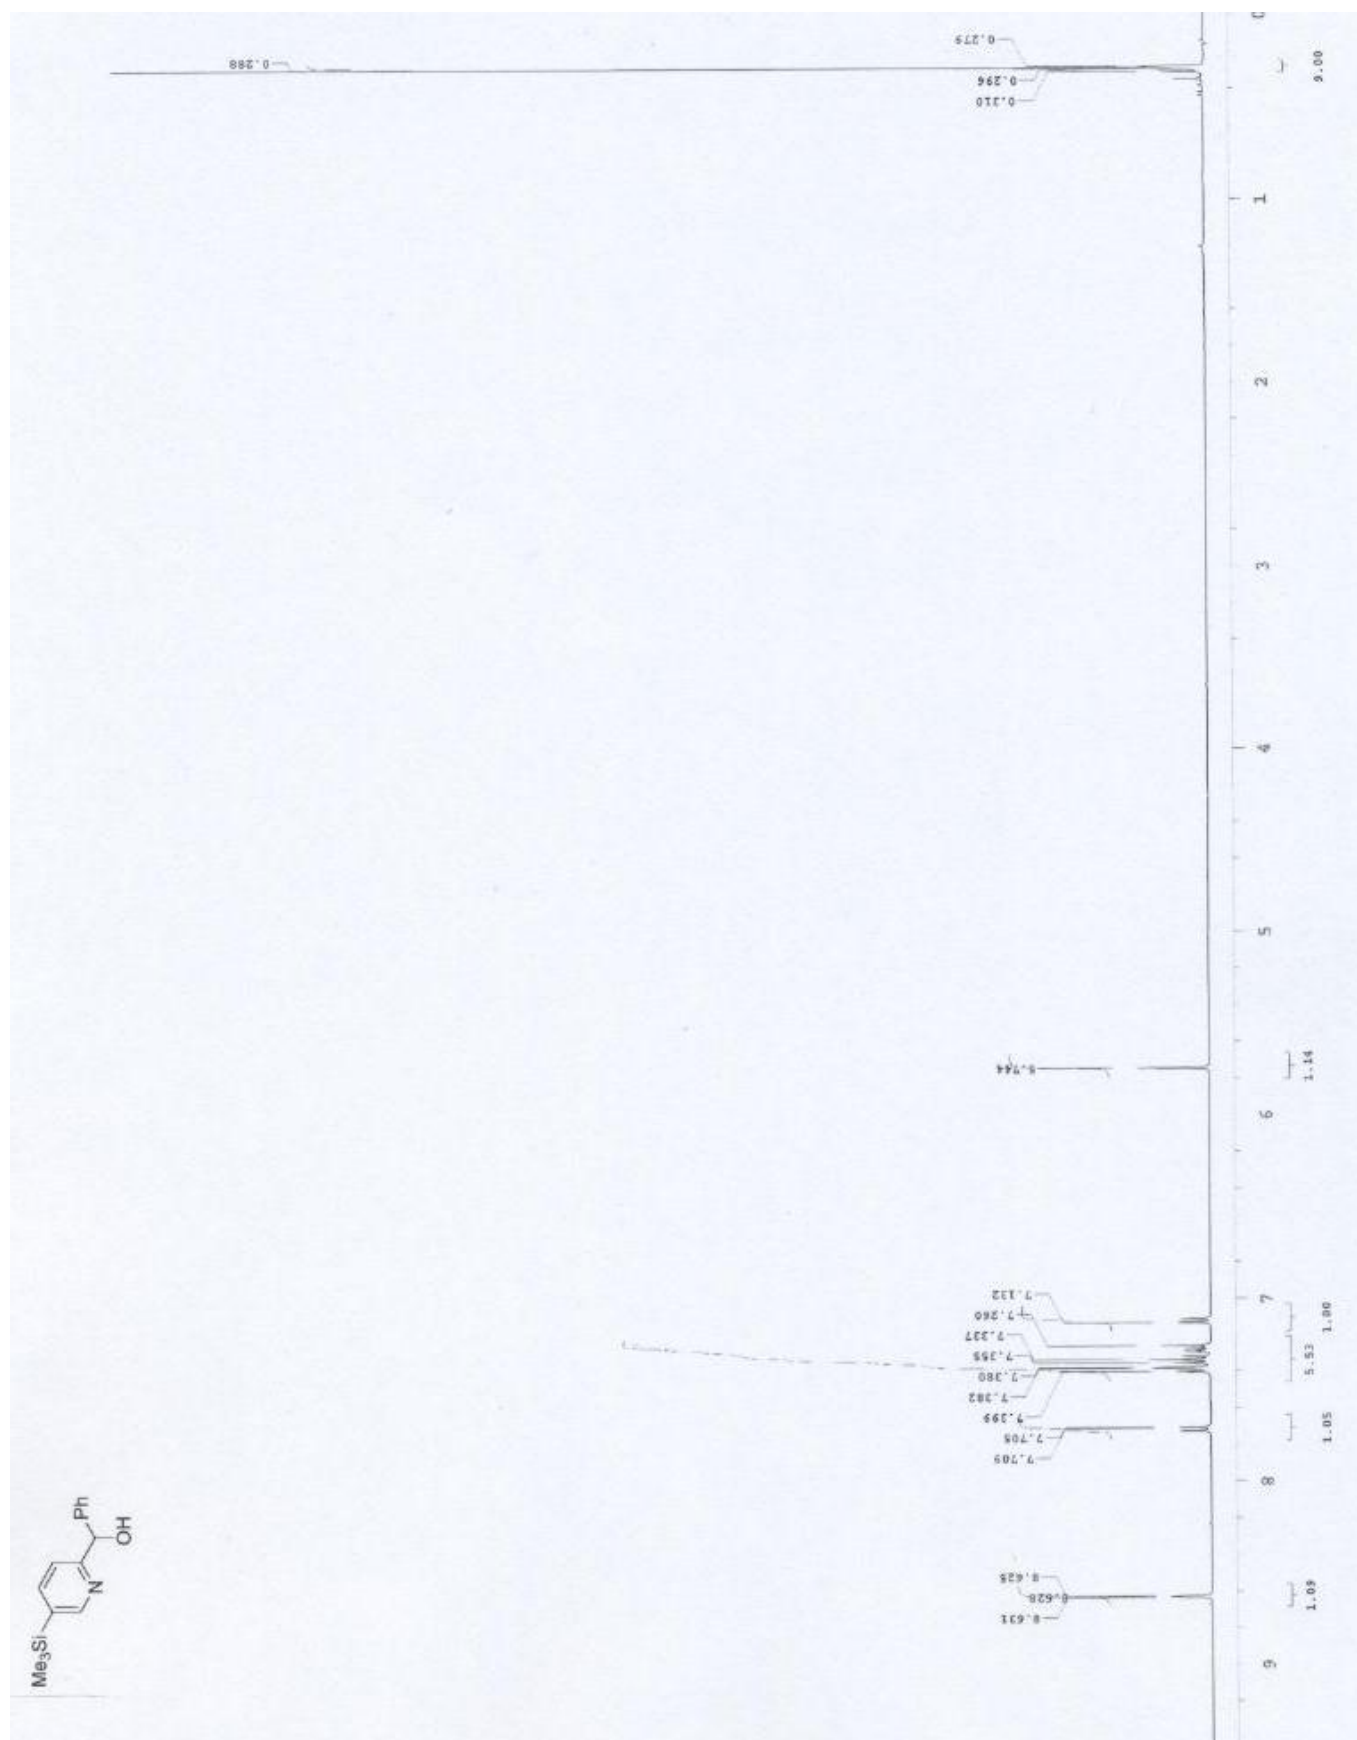

<sup>1</sup>H NMR spectrum of 2-(α-hydroxybenzyl)-5-trimethylsilylpyridine

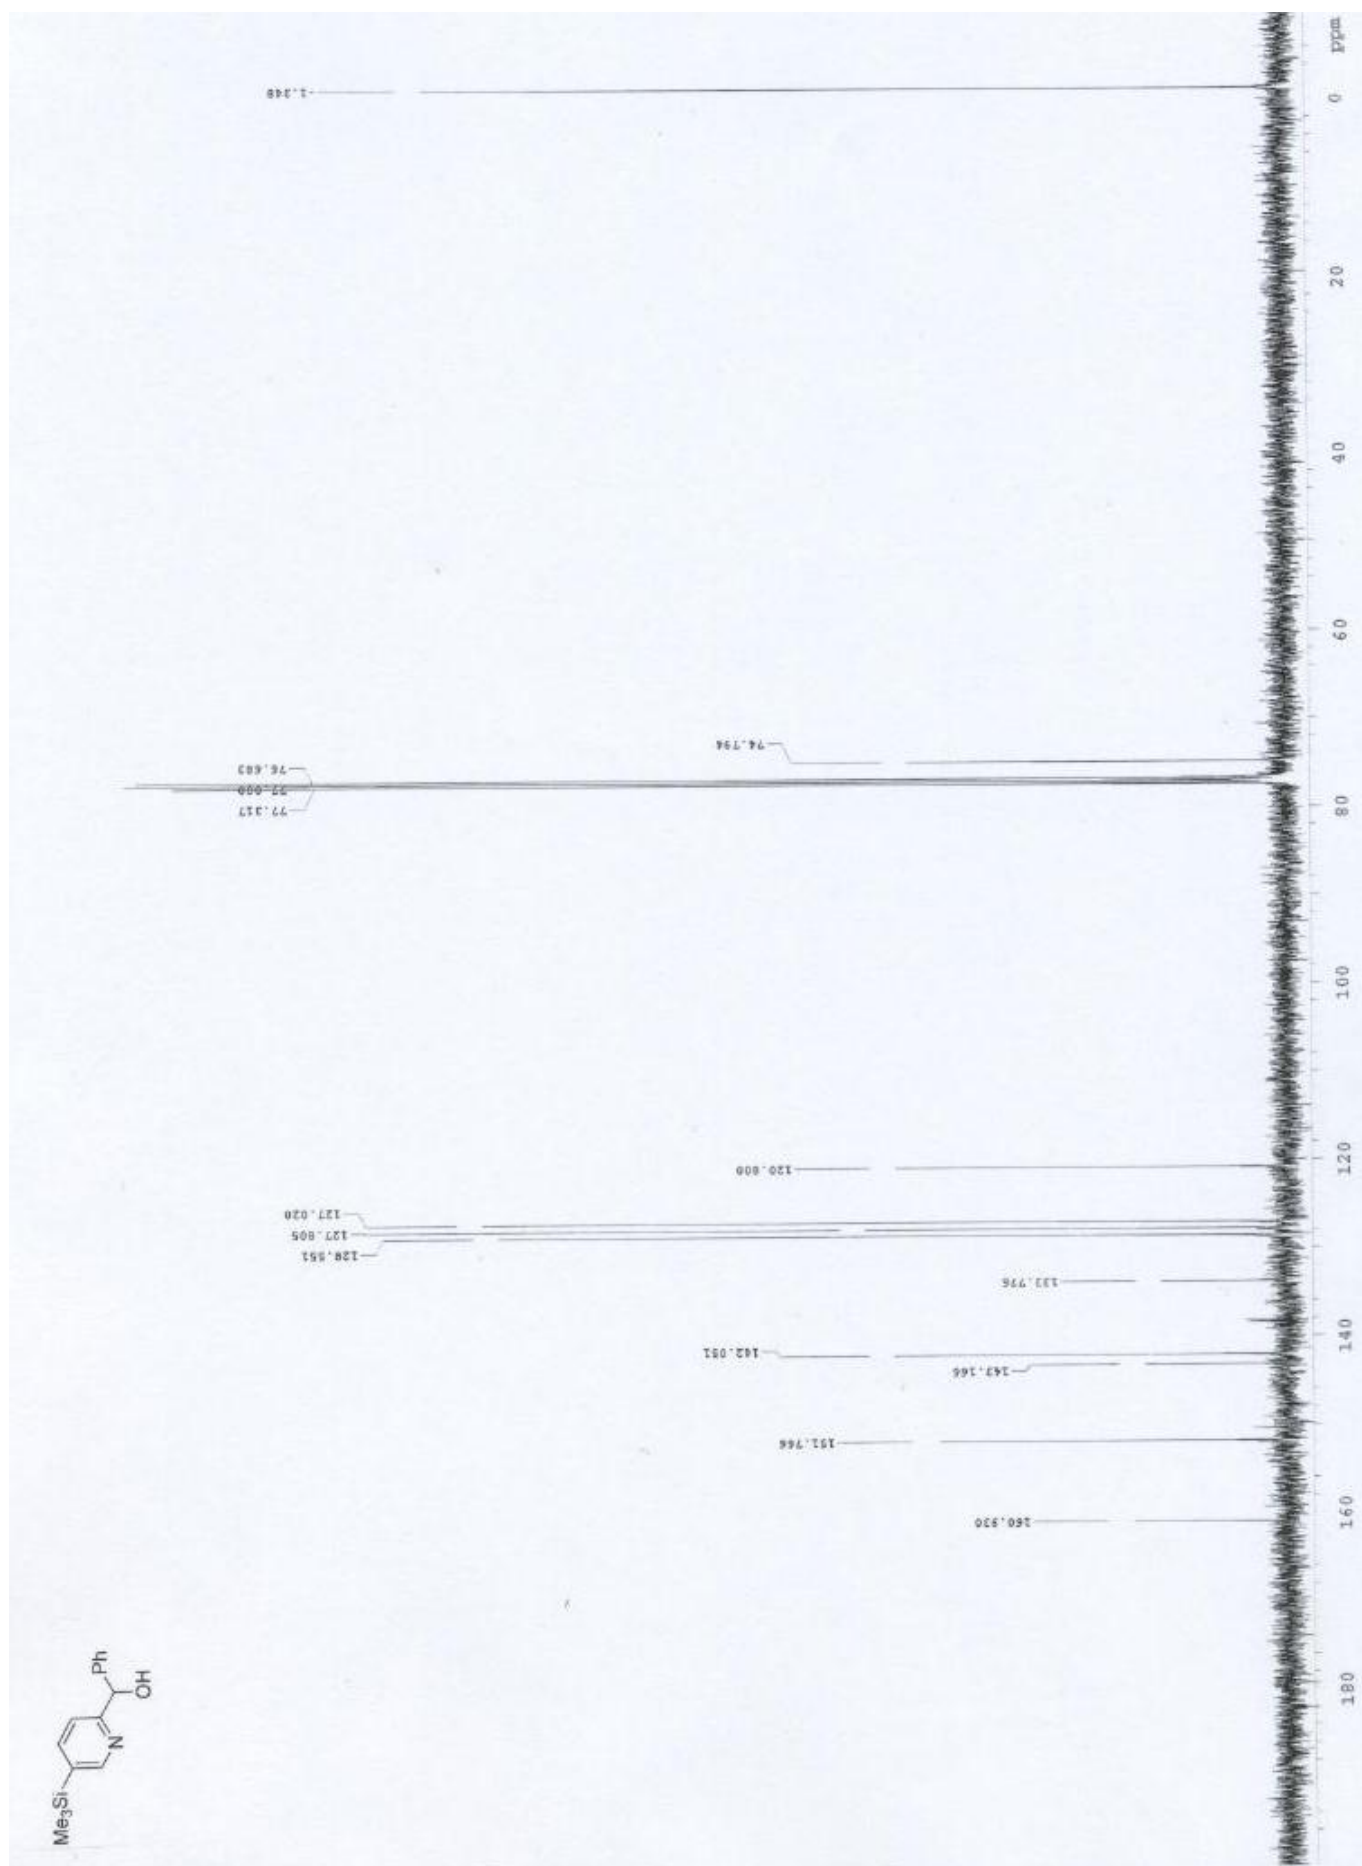

$^{13}\text{C}$  NMR spectrum of 2-( $\alpha$ -hydroxybenzyl)-5-trimethylsilylpyridine



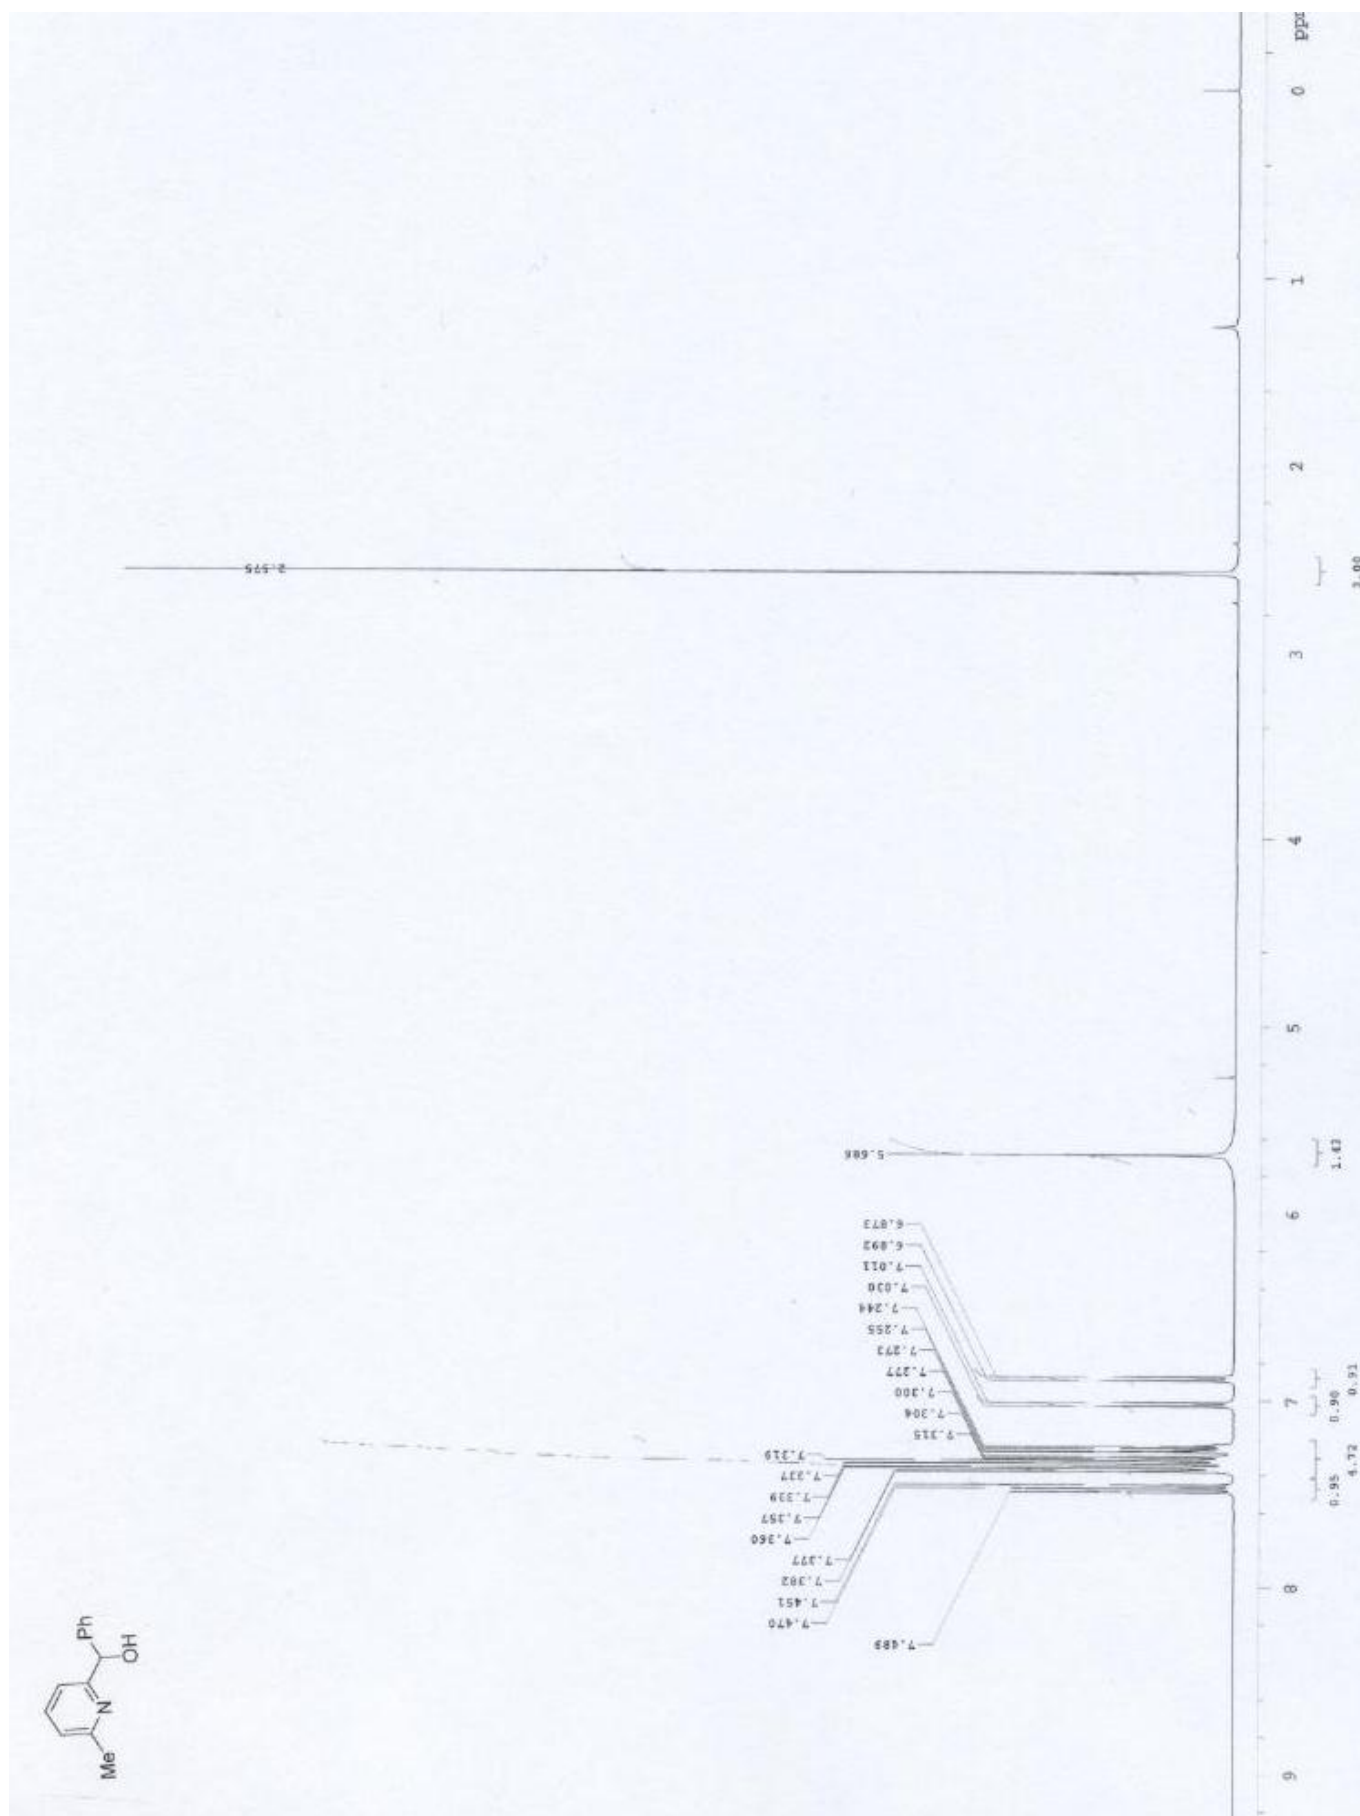

$^1\text{H}$  NMR spectrum of 2-( $\alpha$ -hydroxybenzyl)-6-methylpyridine

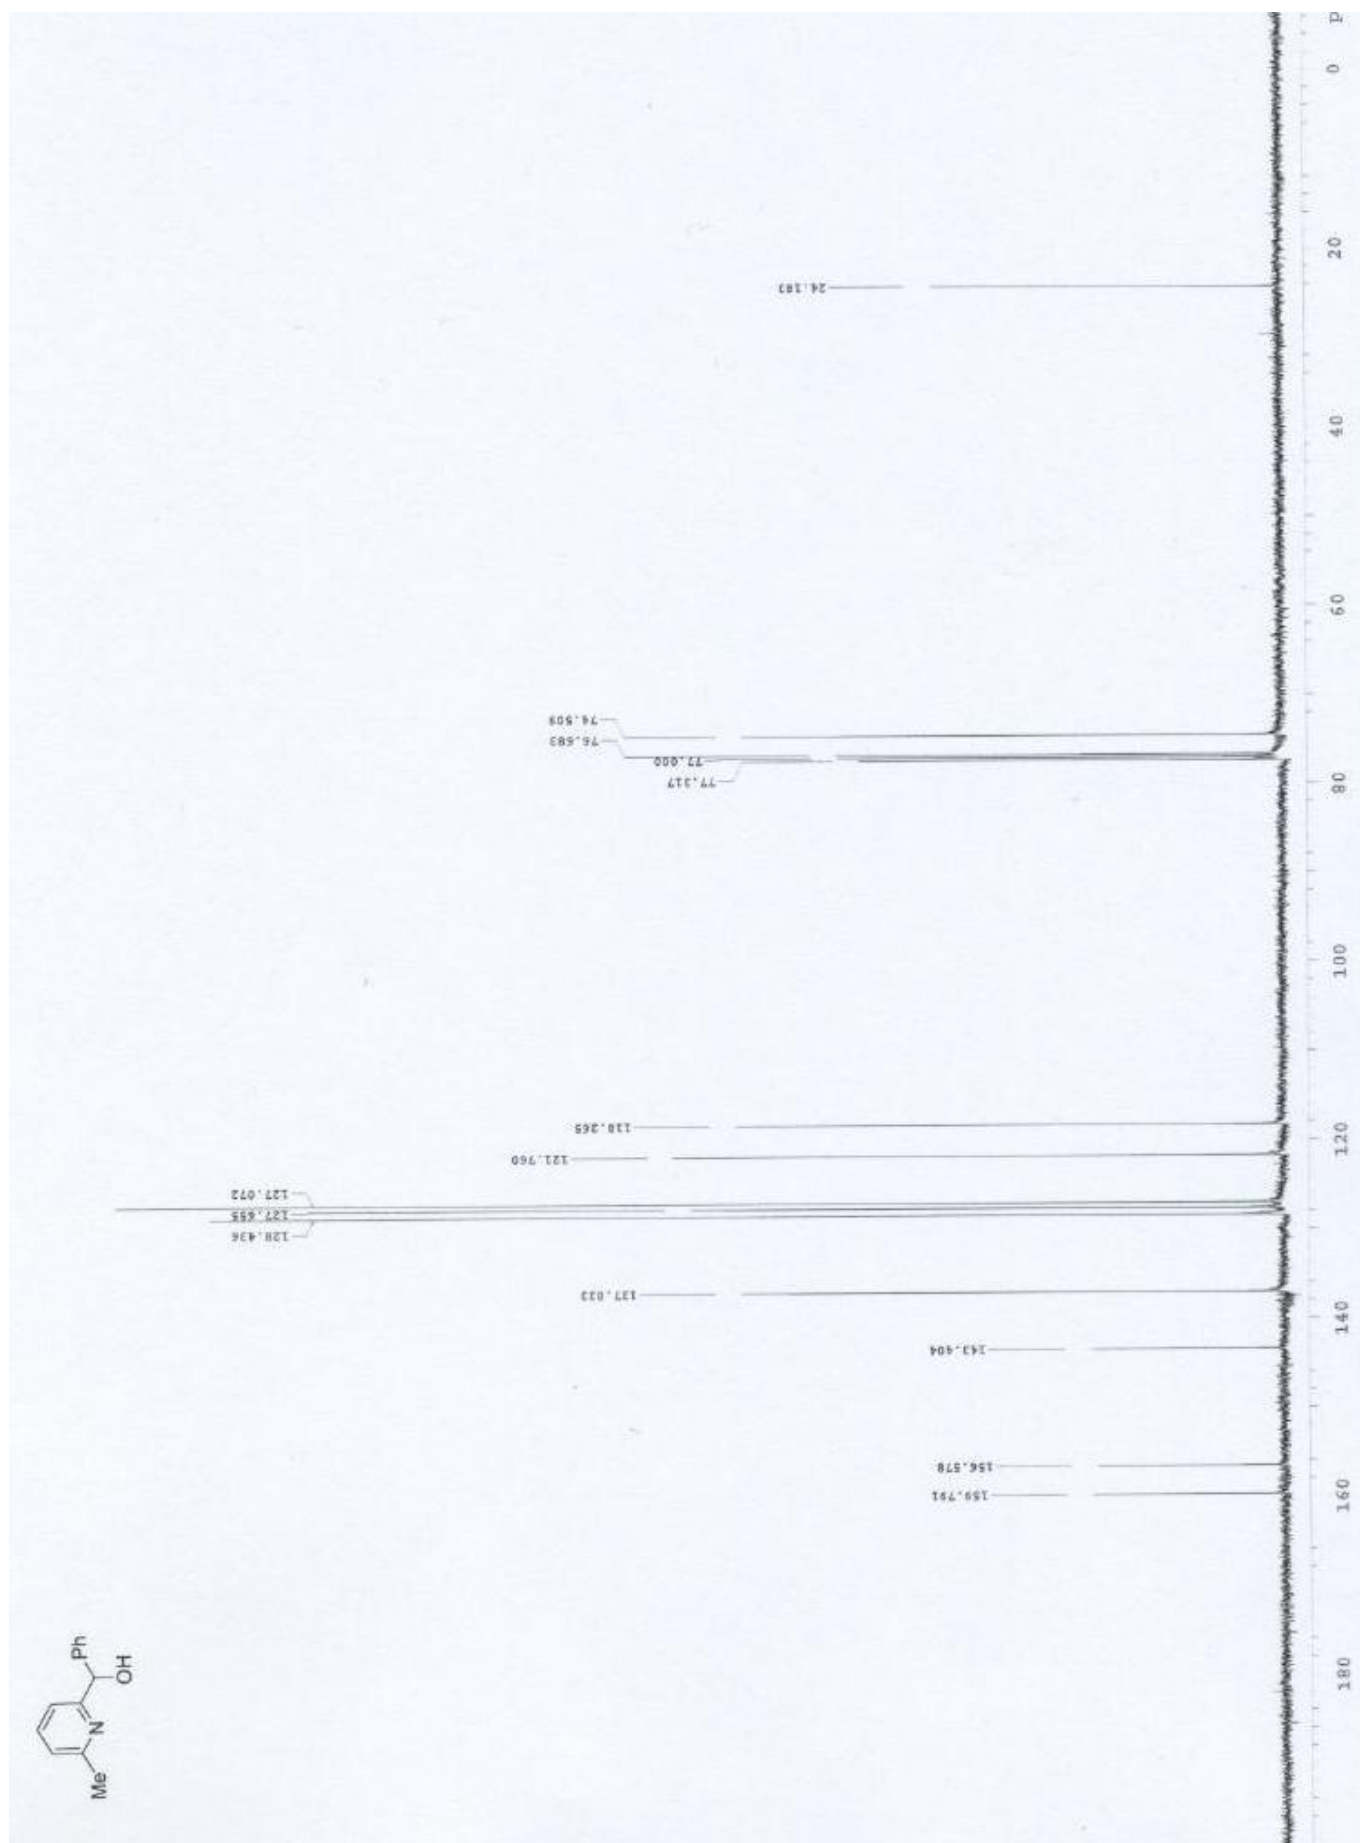

$^{13}\text{C}$  NMR spectrum of 2-( $\alpha$ -hydroxybenzyl)-6-methylpyridine

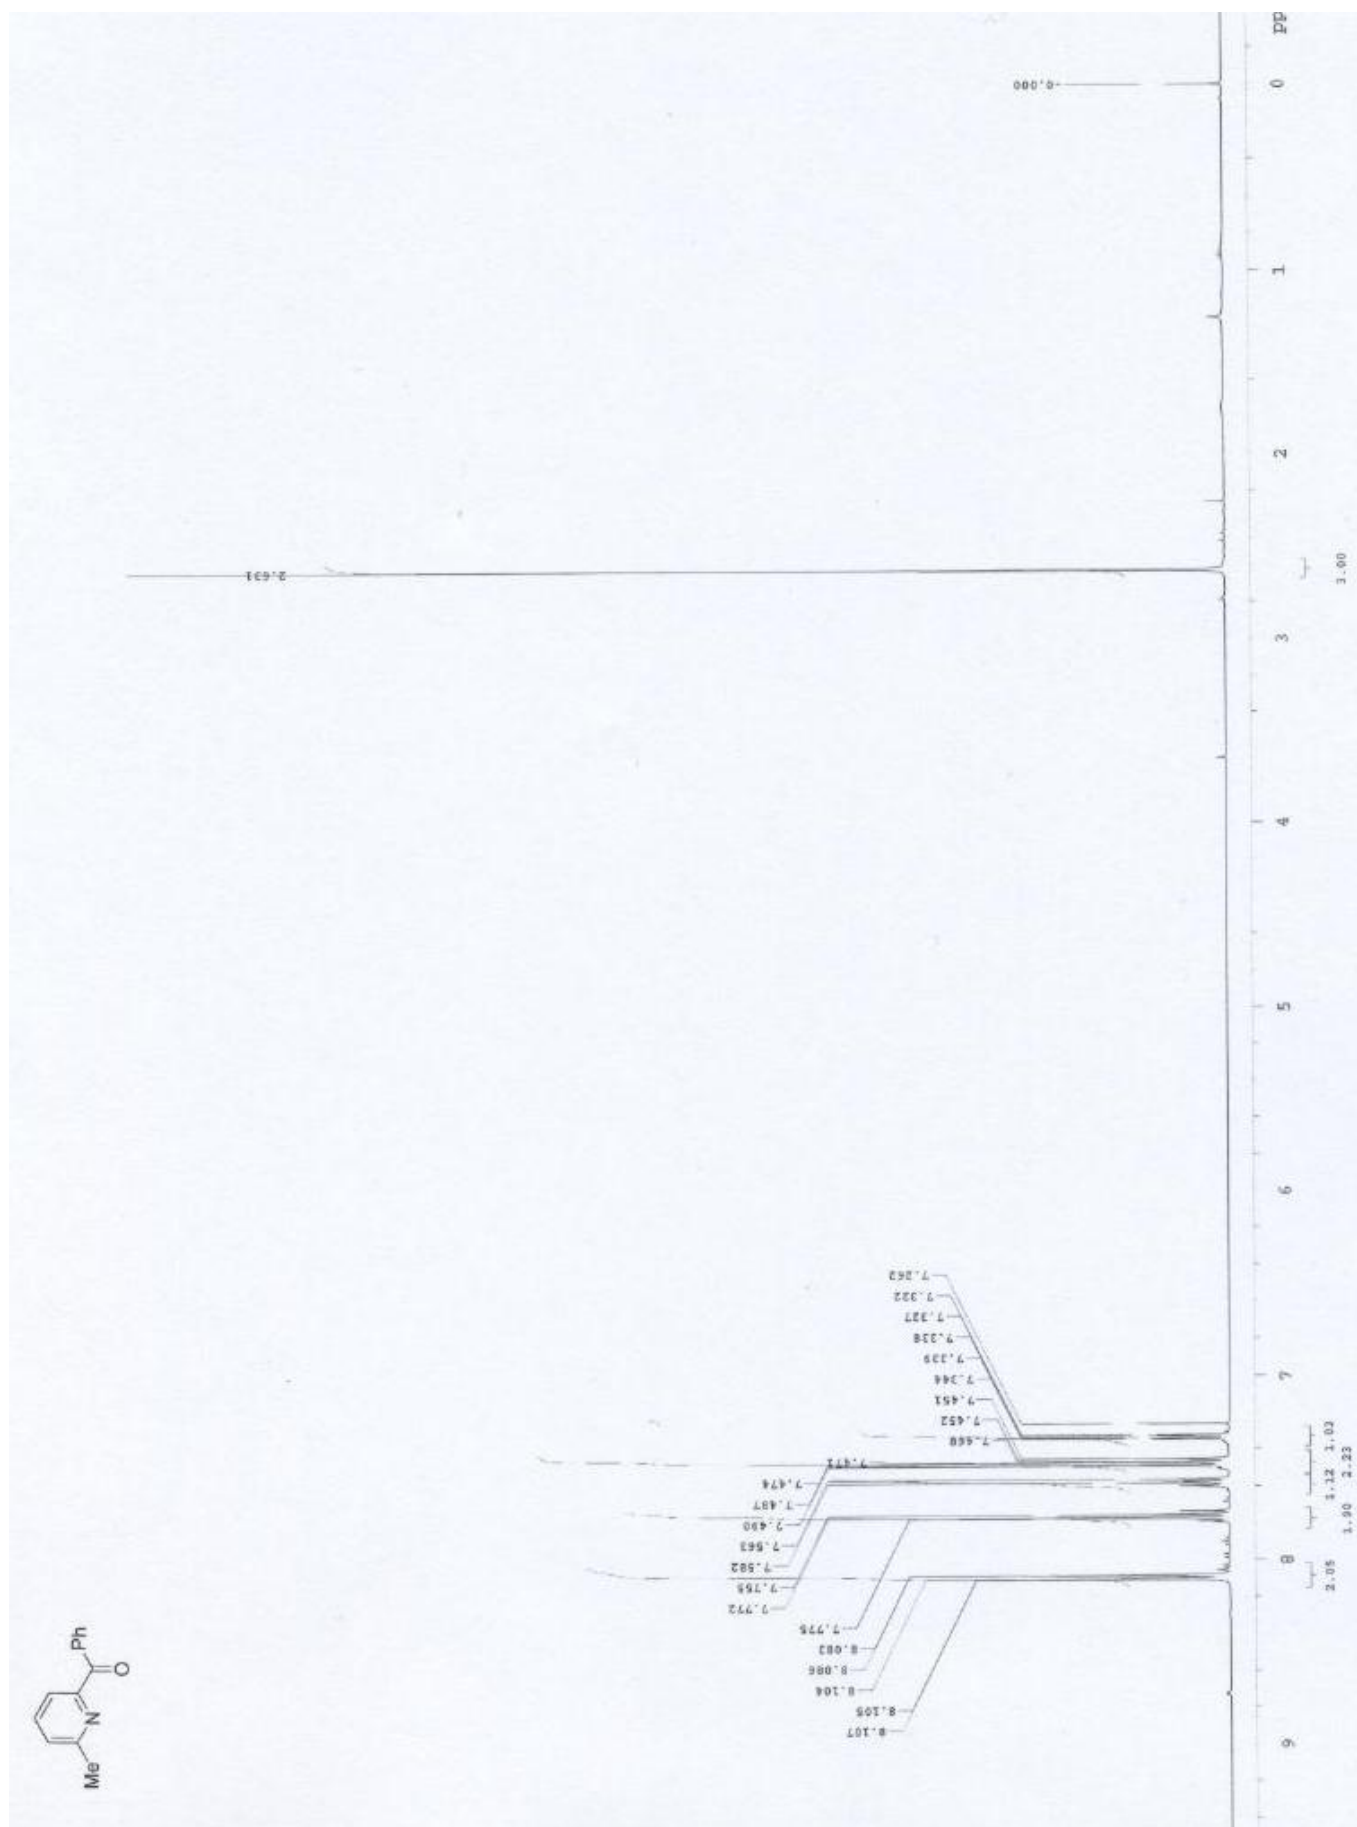

<sup>1</sup>H NMR spectrum of 2-benzoyl-6-methylpyridine



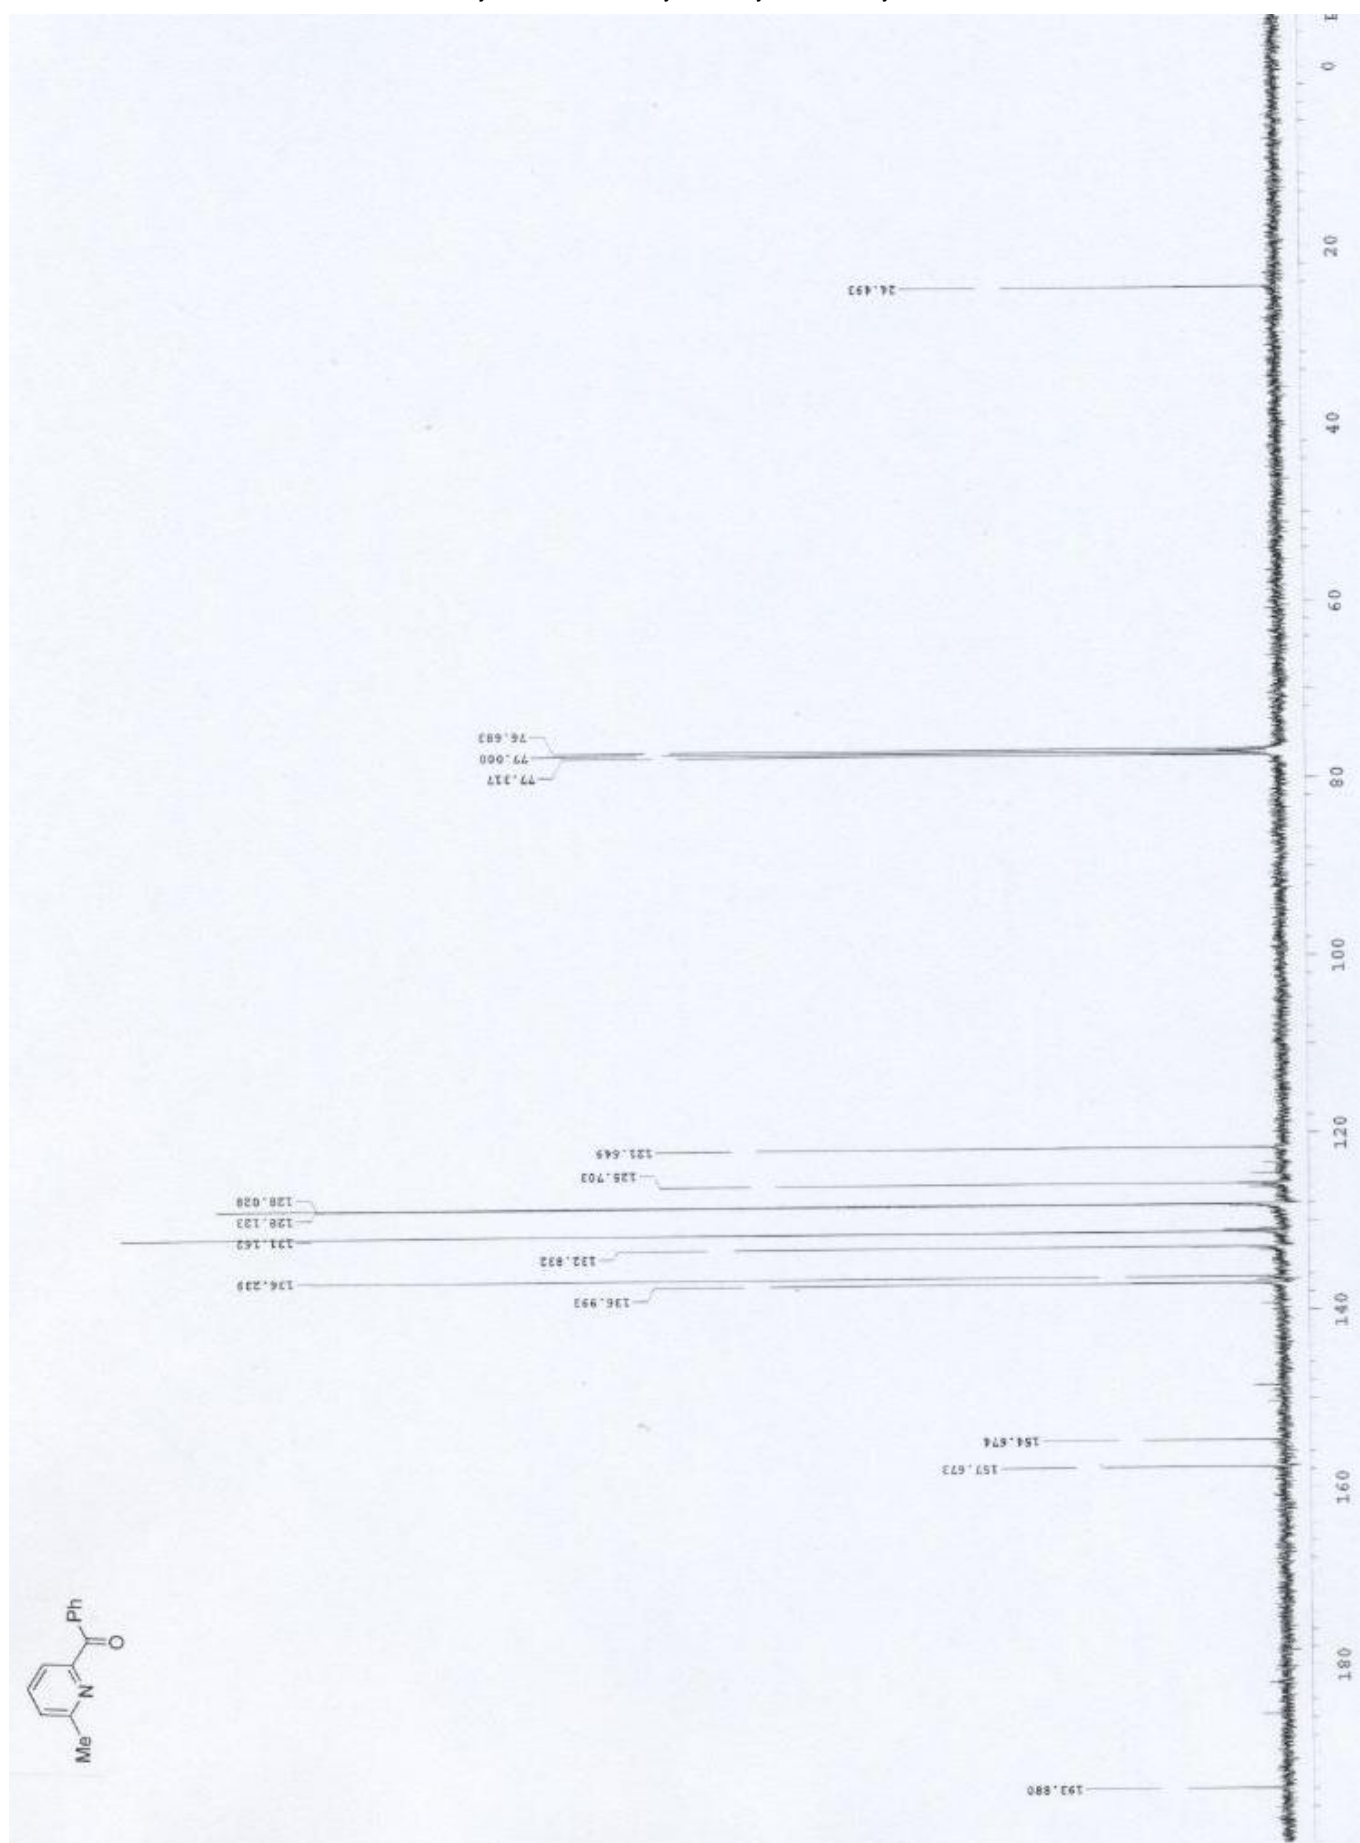

$^{13}\text{C}$  NMR spectrum of 2-benzoyl-6-methylpyridine

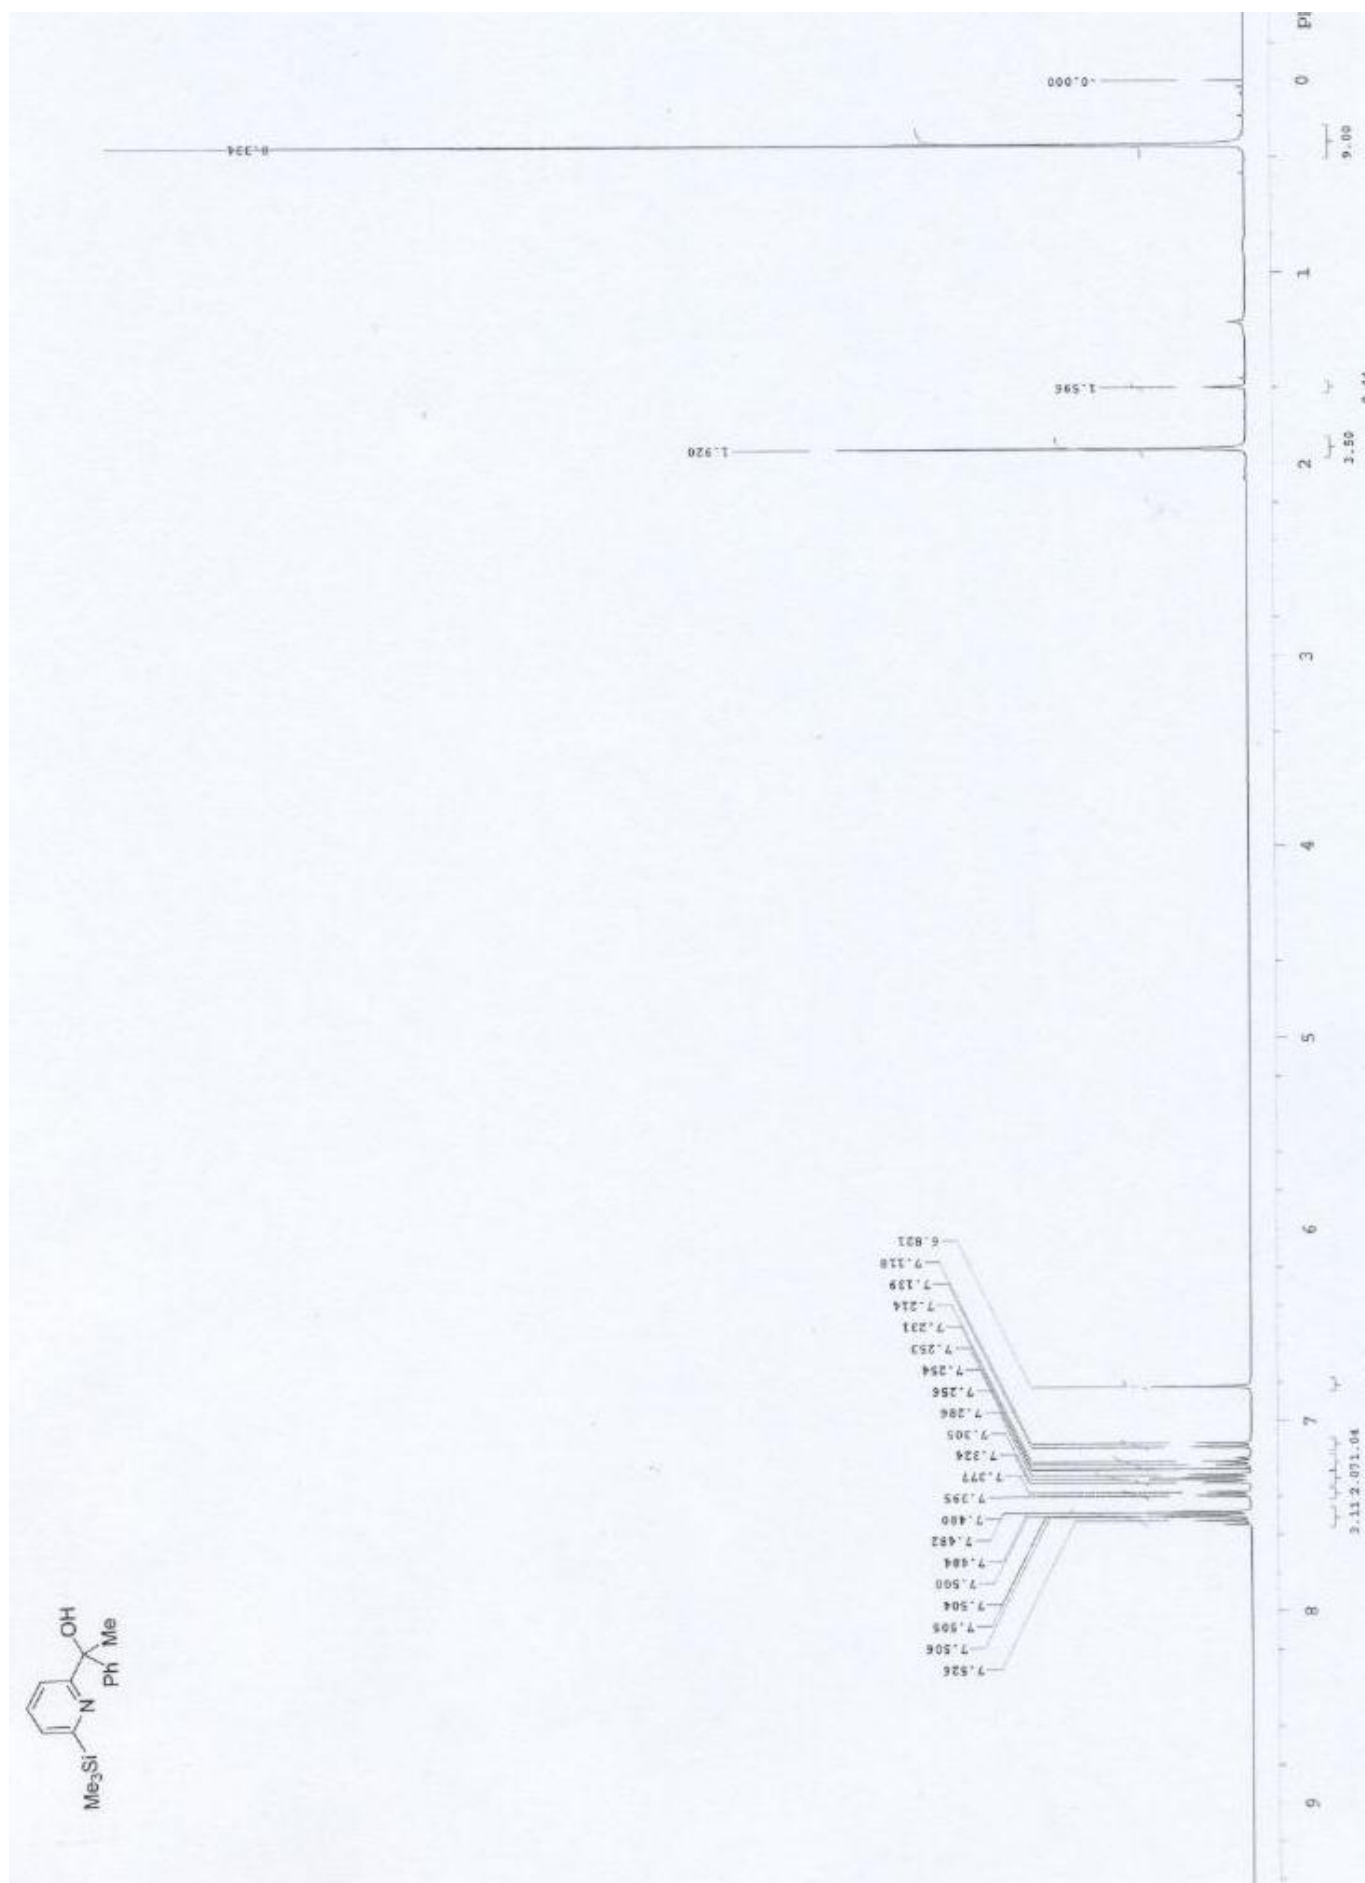

<sup>1</sup>H NMR spectrum of 2-(1-hydroxy-1-phenylethyl)-6-trimethylsilylpyridine

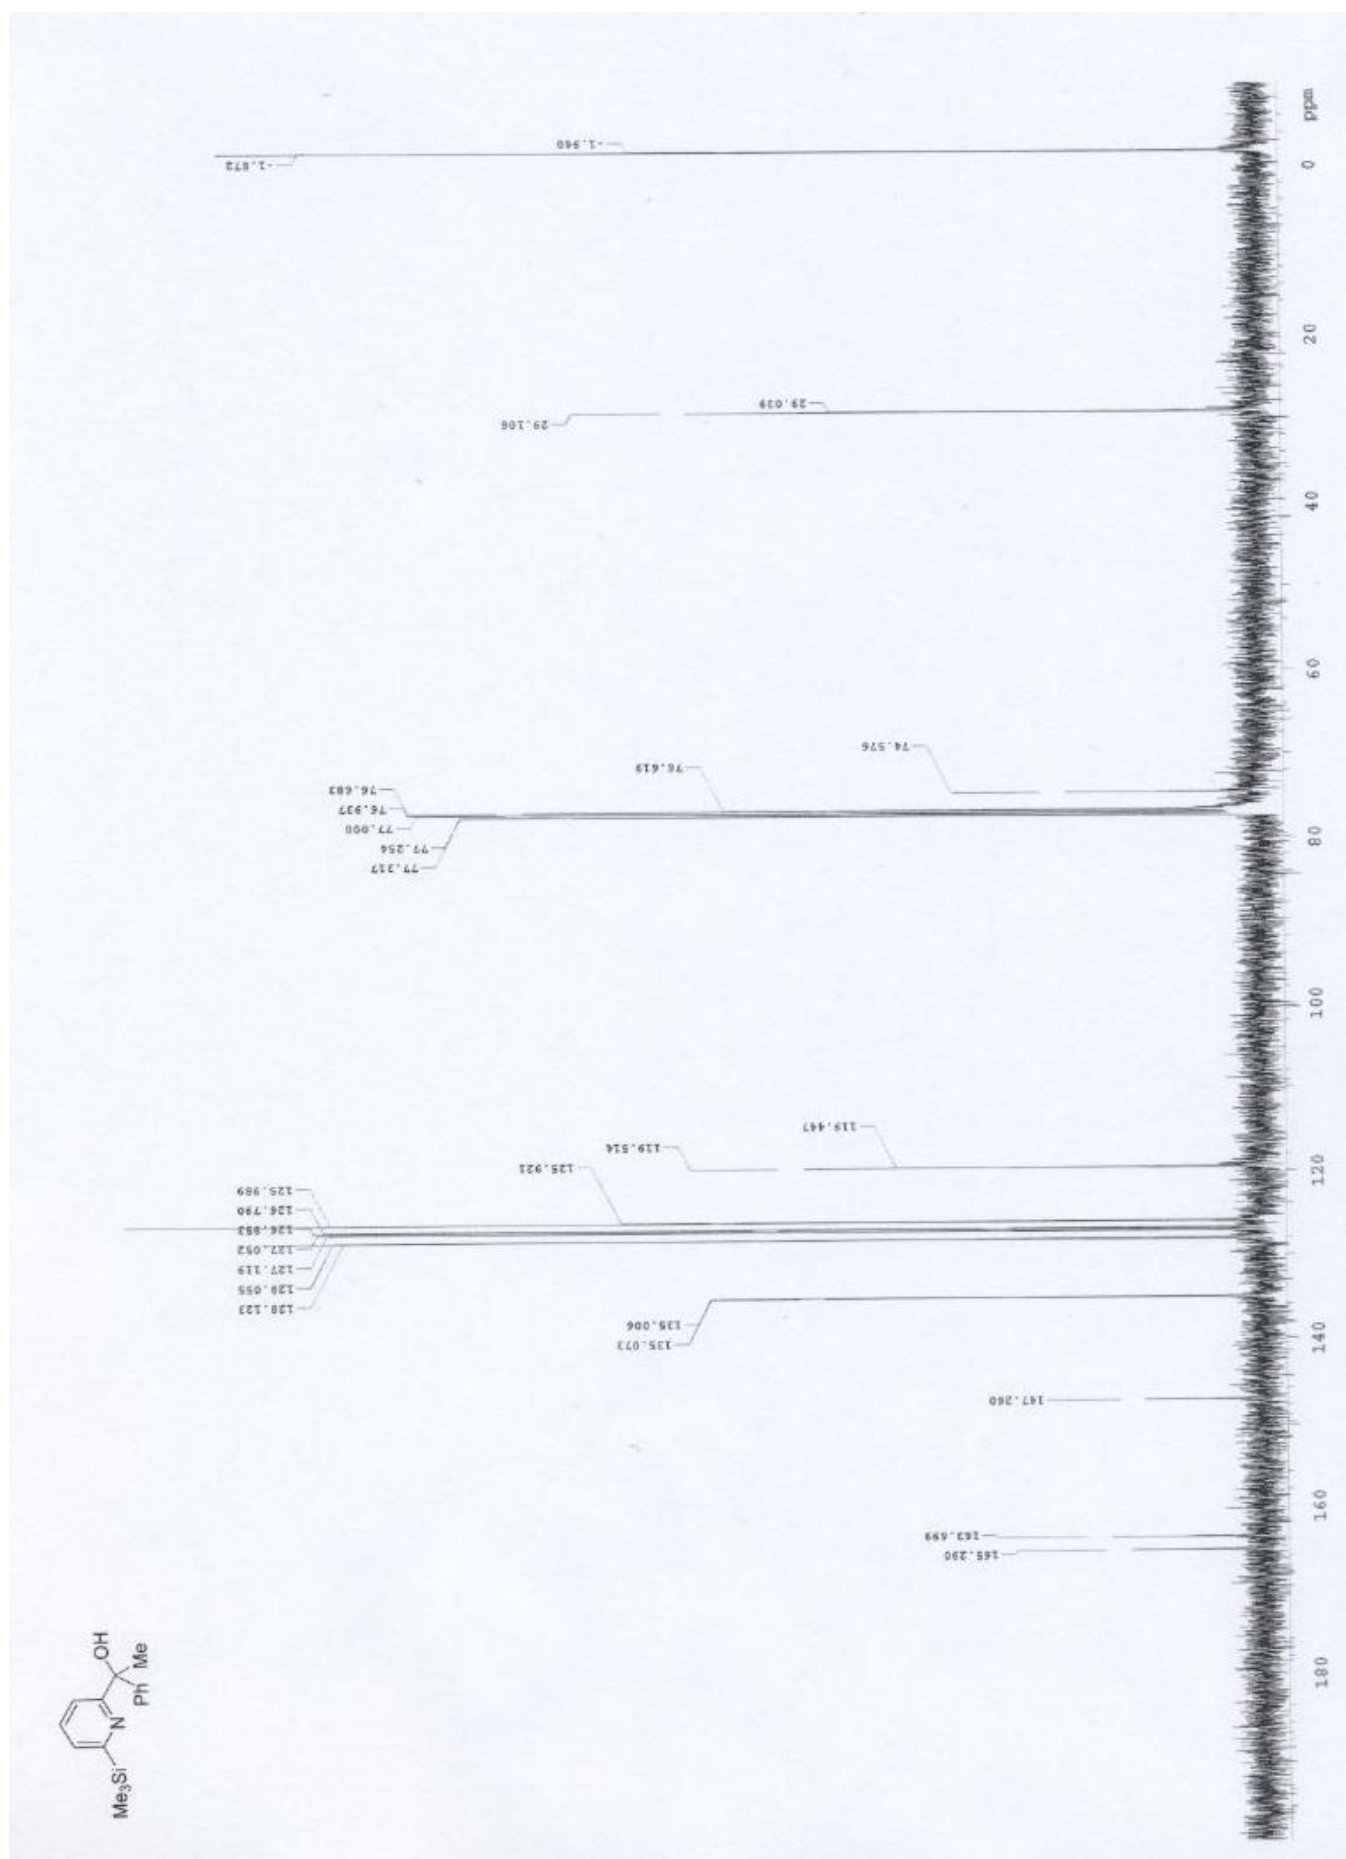

<sup>13</sup>C NMR spectrum of 2-(1-hydroxy-1-phenylethyl)-6-trimethylsilylpyridine
